# Supplementary material for: The Structure and Function of Acylglycerophosphate Acyltransferase 4/ Lysophosphatidic Acid Acyltransferase Delta (AGPAT4/LPAATδ)
Source: Front Cell Dev Biol. 2019 Aug 2;7:147. doi: 10.3389/fcell.2019.00147 (PMC6688108; doi:10.3389/fcell.2019.00147)
Supplement: Supplementary file 1 [file Table_1.xlsx]

## Sheet: Foglio2
	Accession number	Protein name	Species name	Kingdom name	Motif I Motif II Motif III Motif IV NHxxxxD (F/Y)xxR EGTR
	5KYM_A	PlsC	Thermotoga maritima	Bacteria	----------------------------------------------------------------------------------------------------------------------------------------------------------------------------MRKIRNLLLT-LYFYFIAT----VYIVFYGGF--------------VLFRSFLMRD---REKARKYVLKEIEK-FGKRAFTWL-----------FSDVVV-----EGSENI-----PKD--RNFIVVANHQSLMDIPLILG-------FVA-----TGAFIAK-EEL--RKIPGVNWYIRYLNGVFLDRKNPRR----A--VRA---LREA-IEKLKNGVTF--IVF…
	A0A0S3QT16	PlsC	Thermosulfidibacter takaii	Bacteria	-----------------------------------------------------------------------------------------------------------------------------------------------------------------------------------------MIRTIIFW--LVC--SGIVATLG-------------------P-FFILSTYIDKSKKTAAKIAAFWCWC-------LVKVAGVKIKV-----KNEQIL------KQ-YPQYVIVSNHQSYFDIFVLIV----V--LKK-----IPHFLAK-KEL--FRIPIFGQALRVADVIEIDRENPDK----A--LES---IKKALDK--GLPYPI--CIY…
	A0A250LPP1	PlsC	Fusobacterium varium	Bacteria	------------------------------------------------------------------------------------------------------------------------------------------------------------------------M--LGLILASSTG----FFLFI---------FISIF--------------YLPKIHFLSE---RKGVEYS--R-------RKLKWLSRMVLGSL----NVKLRVKYKNRRAINSL-----D-K-TKGIIFVCNHQSNLDIPAIVT----A--LHM-----DVGFVAK-HEM--KSWPFFGTWMKKSNCVFLNRENPRE----G--IKD---MKKA-VELIKKGYPT--VIF…
	Q59188	PlsC	Borrelia burgdorferi	Bacteria	--------------------------------------------------------------------------------------------------------------------------------------------------------------MII-------V--FMKILRSIITY-FNVLLFFL----ILIFFLFPF--------------YLVCKIFLIE---RYVVRLS--FIMMRACIKISLWLAGIKII-----------V-----TGSENI-----P-K-KSNVIIMGNHIAAMDPLIFIY----T--FAC-----PFVILAK-HSL--LRIPFVNIVLIVMGVIFVNRRSIRS----A--AAA---EVKA-IKVMREGRSI--GIF…
	I0AL93	PlsC	Ignavibacterium album	Bacteria	----------------------------------------------------------------------------------------------------------------------------------------------------------------------------------MITV-IKLLLIVIHT--AICSVFGL--IFI---------FLDRT-------------------------FTLYHWLSKVFSGGILLISGISIKI-----DGLENI------NP-KAVYVFVSNHSSQLDITALQW----G--IPN-----RLAMIFK-KEL--ARIPLFGWQLRLGPYIMIDRKSLES----A--AKS---IEEAKQLMKNKRISV--LVF…
	O25903	PlsC	Helicobacter pylori	Bacteria	-------------------------------------------------------------------------------------------------------------------------------------------------------------------------MKSNKKSNRLRAI-YRAL----------VIAIGLAVIIVFN--------------YF-----NRK---NNNARSSR----RACSCF-------FSLTGVNLEK-----IGTFDT----------DAKLIVLNHQSLLDIIYLEA----Y--HPR-----NICWIAK-KEL--GEIPFYGHALTDTGMILIDREDKKG----I--VS----LLKACKEKLDQNRPL--VIF…
	P26647	PlsC	Escherichia coli	Bacteria	----------------------------------------------------------------------------------------------------------------------------------------------------------------------------------MLYI-FRLIITVIYS--ILVCVFGSIYCLF-------------------------SPRNPKHVATFG----HMFGRL-------APLFGLKVEC-----RKPTDA------ES-YGNAIYIANHQNNYDMVTASN----I--VQP-----PTVTVGK-KSL--LWIPFFGQLYWLTGNLLIDRNNRTK----A--HGT---IAEVVNHFKKRRISI--WMF…
	A0A1K3HCG2	PlsC_1	Mycobacterium tuberculosis	Bacteria	----------------------------------------------------------------------------------------------------------------------------------------------------------------------------------MLAI-LRIIIVIIYC--IFGSLAGILICLT-------------------------SPRNPKHVMTFG----RMYGKL-------SHVFGIKMVY-----RIPEEA------KH-YGSCVYVGNHQNNYDMITMSN----A--VQP-----RTVTVGK-RSL--IWIPFFGQLYWISGNILIDRSNRSK----A--HNT---ITQVADQIKKRNISV--WMF…
	A0A399E7Y0	PlsC	Meiothermus cateniformans	Bacteria	---------------------------------------------------------------------------------------------------------------------------------------------------------------------------------------------------------------------------MYEYGLG-------------------VYKVCKVIAR------FLLQVLFGLKV-----EGAEKI------PK-EGPVILASNHMSFLDPVVMGV----A--CPR-----VVSYMSR-DDV--FNYPILRWLLPRLYVIPVSRGSGD--------LGA---IKAAI-RVLKNGMAF--GIF…
	U5QG92	PlsC	Gloeobacter kilaueensis	Bacteria	---------------------------------------------------------------------------------------------------------------------------------------------------------------------------------------------------------------MKT-LR-P-EQTLVAYHLF-------------------KW----LIVS------PILHTALRVKI-----AGEAHV------PA-TGAVILASSHASHLDPVILAN----C--ARR-----PVAFMAK-EEL--FTNPVLSRVIRLYGAFPVKRGSGD--------RGA---IRAAL-EALDYQWAV--GIF…
	Q49402	PlsC	Mycoplasma genitalium	Bacteria	-----------------------------------------------------------------------------------------------------------------------------------------------------------------MDKLFKTS--FRFIIRFLQIL-SLPVVFPY----FL-----LS--------------FLACLITSKN-YESLPYNYPPEIRFKKVYRLVSMWLY----------------I-----KGIKVVTVNDKIIP-KKPVLVVANHKSNLDPLVLIK----A--FGRLKNSPPLTFVAK-IEL--KDTV-LFKLMKLIDCVFIDRKNIRQ----I--ANA---LETQ-QQLIRQGTAI--AVF…
	A0A075HSJ9	PlsC	Euryarchaeote KM3_86_F07	Archaea	------------------------------------------------------------------------------------------------------------------------------------------------------------------------------------------MY---L-----IVMAGMYKTLVSIILW-PIFMSLFVLGVG----GYFILTTFISLQQAHLY-MKWFCRI------CLFTAGQILRV-----EGNIPK------KE-KQPYIYMFNHESMFDHFMIVA----A--TSH-----YLTGVAA-EDQ--YSYPVYGAGLRRYKAIPIKREKLKD----A--IHS---LDAAE-SVIKNGISL--LIA…
	A0A2P6VTP1	AGPAT	Thermoplasmatales archaeon	Archaea	-------------------------------------------------------------------------------------------------------------------------------------------------------------------------------------------------------------------------MGLLPFDLG----LRG--ANPQEWEEVPVYEVLKRLAS------RPVQESFDVEA-----RGLANV------PD-EGGGVIASNHASWFDPVFLGS----V--LDR-----PVHWMAK-AGL--FRNPITETFFEKAGQIKVDRISGG-----N--QAA---VDKSV-ELAREGRLS--GIF…
	A0A3M0Y4H4	AGPAT	Candidatus Pacearchaeota archaeon	Archaea	-------------------------------------------------------------------------------------------------------------------------------------------------------------------------------------M-QRERM-----------VEGRT-SFR--------ERVLPPYSIS-----------QINAEFAE---RGERELR-------KWVSELEIEV-----EAEREQ------YH-TGPVVYLSNHLSQLDYFVPKFAMLAVG-LPF-----A-RAVAG-DNLRHWVVRNLIYDFEKYGVLWHDRASRKQ----G--LES---YVESLAECLASGESV--LVF…
	A0A2E9U4E8	AGPAT	Candidatus Woesearchaeota archaeon	Archaea	----------------------------------------------------------------------------------------------------------------------------------------------------------------------------------------------------------------------------------------------------MVYPIAKLTIT------S-FIKLFIKEI-----NGRDNV------IR-NSPFIVACNHASFFDDLAVPSVIIPM--LNK-----KIHFYVH-MRY--FNNYFLRKFLEWGGSISVDPTKGKRYKEIN--KNA---FQTAS-KHLKKNEIV--GIF…
	A0A075H9K7	PlsC	Thaumarchaeote KM3_45_G08	Archaea	--------------------------------------------------------------------------------------------------------------------------------------------------------------------------------------------------------------------------------------------------------------------------------------------------------MVAAKHQSAWETIDLLG----V--LPD-----ACF-VLK-REL--VYIPIFGWYISRNKQIVVNRSAGMV----A--LKR---MLAQAQQAIAEDRQI--VVF…
	RLI38395.1	AGPAT	Candidatus Bathyarchaeota archaeon	Archaea	--------------------------------------------------------------------------------------------------------------------------------------------------------------MAVVLKYIKPV--VDFVITSLFWI-Y--YIFGY----LLFFF--PP--------------YLAS--FIFS---SN--REATFQRLNHFFFRGFF--------------FLTRTI-----IPQQKLHIQEEVLS-VRSSVIVCNHLSYLDPLLLIS-------LFE-----KQKTIVK-SVF--FKIPVFGWLMKTSGYVPSRAGEDFA----SLMIKN---IEGM-RDYLSSGGNL--FIF…
	A0A1Q9MU65	AGPAT	Lokiarchaeota archaeon	Archaea	------------------------------------------------------------------MEKT------------EV--IQ----------------KKDQEKE----KI-------VDGALATTM----LQS----EQIALTN-----KKSKDFFTSI----------SKSQDF-QKMLSKVL------ESTGGLGIDLMNN-VF---VDILEKLGLF----EKM--SKTL------YWST-WLWLR------TFFRIAWKGRV-----Y-GDMF------PE-YGSGIFVGNHVSHLDPFMLSQ----A--IHK-----RVIWMSK-EEN--FQTPIVRSIFKNFGAFPLKRGTHD--------EVA---WATAK-EVLKTDNWL--GMF…
	A0A1Q9NL08	PlsC_2	Candidatus Heimdallarchaeota archaeon	Archaea	-------------------------------------------------------------------------MSSFQN------------------------------------K----------------------NP----YSSAETE----------V----------GKFTRTEELF-KKVKVGYSKT--KLYDGSGK---LG-------------PADYF--------DYDFQSSHFATKLLGVFF-RR-------AVHLGWKTRF-----EGVENI------PN-DKNIILMPNHISHLDGPLAIIGATKR--LEK-----SIDVIGD-EKL--FKNRFMRKFLSLFNAFPMKKGSKDI----K--I-----VDYAI--KRSSKNSL--LWF…
	XP_019853566.1	AGPAT	Amphimedon queenslandica	Animalia	-------------------------------------------------------------------------------------------------------------------------------------------------------------------MIL----HAPHLILSLRCLVPSVFLMGSST--SY------WVAAT----------LLKLISLPFGGQRGRSLYHRMDQRLYSSMMAMFGYFF-------EHWSGVQYCF-----YGDPLP-------QTPESVIYISNHQSTVDWLIPEILCLKQGGFGG-----RVHYFLK-KAV--LYIPLYGSYLGTRHNIFLKKNQSKN-------HDW---LKRKLLELGNTGIPVWLVIF…
	B3RNN2	AGPAT	Trichoplax adhaerens	Animalia	------------------------------------------------------------------------------------------------------------------------------------------------MGDSNFY------YV--AVTILLIVTAMYWLSSAVRFY-VRLGCFTLIV--IILANVVSIIALV-------------------------YPRNLNSYYISKFFGIPLLWLL-------KPILNIKVKA-----RGLQHF------KQCQSPYIIVCNHQSSLDLYPLLR----I--VPP-----KTVAVAK-KEL--LYTPIIGQAAWLTHTVFVDRGDHAS----A--VET---LNKVIQEMKKKSFNL--WVF…
	T2M661	AGPAT1	Hydra vulgaris	Animalia	------------------------------------------------------------------------------------------------------------------------------------------------MCWLYF------------LLVTVLIYAGTWASSTIKYH-VKYITFSLYC--IFLACVTSLFCFI-------------------------NPRSSYNLVIVQ--KALKIFNF-------EWLFGVNITI-----KNGENL------KNCKKPFVVVSNHQSAIDALIMVK----S--SPN-----GTAPLAK-EIL--FYVPIFGQVCWLCGTIFINRKQGKV----A--IDI---MRKVGQEMKKKLTSL--WIF…
	Q9VYJ4	AGPAT1	Drosophila melanogaster	Animalia	------------------------------------------------------------------------------------------------------------------------------------M----ITM----TSFIELL----------GLFLLLMLPFLYETNHIFRYY-FKFLMYYGIV--SFNSIILIPAFLT-------------------------RPCDVRNLLWAS---TWCH-RV-------STLIGLRWEL-----RGKEHL------AK-DQACIIVANHQSSLDVLGMFN--IWH--VMN-----KCTVVAK-REL--FYAWPFGLAAWLAGLIFIDRVRGEK----A--RET---LNDVNRRIKKQRIKL--WVF…
	Q7KTI0	AGPAT2	Drosophila melanogaster	Animalia	------------------------------------------------------------------------------------------------------------------------------------M----ACT----CEVIGLA-----------CVVA------LILSATAKAP-YQMRMFFIFFGAGLIVFLCVPFMIL-------------------------RPRDYRNALFPS----WCFRQL-------CRLVGITMEV-----RGLENV------RK-DHGAVVIMNHQSAVDLCVLAY--LWP--VIG-----RATVVSK-KEV--LYIPFFGIGAWLWGTLYIDRSRKTD----S--INS---LQKEAKAIQERNCKL--LLF…
	A0A2C9KS05	AGPAT	Biomphalaria glabrata	Animalia	-----------------------------------------------------------------------------------------------------------------------------MMA----V----LDS----LTLWQFI----------IIFLLLVIPVAYQLSGTFKYY-FKLLIYHTLT--ILIGLGVCFYALP-------------------------RGRNTKNHNFVT---GCVKLFL-------WRAVGVKVLI-----RGQEIL------EK-DEPAVIVVNHQSSLDMIPLFT----F--WPE-----NCVSLAK-REL--WLTGPFGLGAWLCGTIYINRLDHQS----A--RKT---METAAELIIKKKLKV--AIF…
	W4Z4S1	AGPAT	Strongylocentrotus purpuratus	Animalia	------------------------------------------------------------------------------------------------------------------------------------------ME----LDWMQIV----------VISVLLGLILLYELSNTFKYY-AKMTLYYTLL--QIQALIIIILSLP-------------------------RPRDPSNHRWAS---MLLS-NT-------NGLFGIRAEV-----RGLHHL------DY-NKPAIVVANHQSSIDLMSMFS--FGV--WPK-----RCVVLGK-KEL--LFFGPFGVSLYLCGTVFVDRLNPEK----A--RST---MEKTAQHIKDKNIKV--WIF…
	Q99943	AGPAT1 (LPAATα)	Homo sapiens	Animalia	------------------------------------------------------------------------------------------------------------------------------MD---------LWP----GAWMLLL------LL--FLLLLFLLPTLWFCSPSAKYF-FKMAFYNGWI--LFLAVLAIPVCAV-------------------------RGRNVENMKILR----LMLLHI-------KYLYGIRVEV-----RGAHHF------PP-SQPYVVVSNHQSSLDLLGMME----V--LPG-----RCVPIAK-REL--LWAGSAGLACWLAGVIFIDRKRTGD----A--ISV---MSEVAQTLLTQDVRV--WVF…
	O15120	AGPAT2 (LPAATβ)	Homo sapiens	Animalia	------------------------------------------------------------------------------------------------------------------------------ME---------LWP----CLAAALL------LL--LLLVQ--------LSRAAEFY-AKVALYCALC--FTVSAVASLVCLLRH-----------------------GGRTVENMSIIG----WFVRSF-------KYFYGLRFEV-----RDPRRL------QE-ARPCVIVSNHQSILDMMGLME----V--LPE-----RCVQIAK-REL--LFLGPVGLIMYLGGVFFINRQRSST----A--MTV---MADLGERMVRENLKV--WIY…
	Q9NRZ7	AGPAT3 (LPAATγ)	Homo sapiens	Animalia	------------------------------------------------------------------------------------------------------------------------------MG-LLAF----LKT-------QFV-----------LHLLV----GFVFVVSGLVIN-----------------FVQLC-T-L----------ALWPVS--------KQLYRRLNCRLAYSLWSQLVMLL-------EWWSCTECTL-----FTDQA--TVER--FGKEHAVIILNHNFEIDFLCGWTMCERFGVLG------SSKVLAK-KEL--LYVPLIGWTWYFLEIVFCKRKWEED-------RDT---VVEGLRRLSDYPEYMWFLLY…
	Q9NRZ5	AGPAT4 (LPAATδ)	Homo sapiens	Animalia	------------------------------------------------------------------------------------------------------------------------------MD-LAGL----LKS-------QFL-----------CHLVF----CYVFIASGLIIN-----------------TIQLF-T-L----------LLWPIN--------KQLFRKINCRLSYCISSQLVMLL-------EWWSGTECTI-----FTDPR--AYLK--YGKENAIVVLNHKFEIDFLCGWSLSERFGLLG------GSKVLAK-KEL--AYVPIIGWMWYFTEMVFCSRKWEQD-------RKT---VATSLQHLRDYPEKYFFLIH…
	Q9NUQ2	AGPAT5 (LPPATε)	Homo sapiens	Animalia	-------------------------------------------------------------------------------------------------------------------------------------------------------------------MLL----SLVLHTYSMRYLLPSVVLLGTAP--TY------VLAWG----------VWRLLSAF----LPARFYQALDDRLYCVYQSMVLFFF-------ENYTGVQILL-----YGD-LP-------KNKENIIYLANHQSTVDWIVADILAIRQNALG------HVRYVLK-EGL--KWLPLYGCYFAQHGGIYVKRSAKFN-------EKE---MRNKLQSYVDAGTPMYLVIF…
	B7XJ35	AGPAT	Enterocytozoon bieneusi	Fungi	---------------------------------------------------------------------------------------------MKH--------------RTFLHDS---IE-------LIT-LGSHALE----QD--NFTQSFVE------NKIFNNYNQFYIILSIIIRY---FVLMPF----RLIVFIVFF--------------CILSIFFSIA---CYINHKYIIDKLFFLYMKLFSF------------------V-----LGIKSCHIGRKYKI-DKPHIYVSNHTSFLDFIVLSS-------YKF-----HHAVISENHGG--IFGLLFKFIISKNGSICFNRTDRKD----K--SIV---KEKIINHCKQGGSPM--IVF…
	A0A0L0HNU1	AGPAT	Spizellomyces punctatus	Fungi	------------------------------------------------------------------MTKT----------------TR----------------KTETA-------S-------RLMTLLA-------RP----QAPALAA-----GAL--IF----L--ILFRRSSRFRFF-ARMFGFIFTM--AISCIVGITVAPVMW--------------LL-----GKP--GLTNYVVAR----TFALIG-------PHFCGLKFKV-----EGKEHL------KNTPMPAVFVCNHQSSLDLLAMGA----I--LPK-----NVVVMGK-KSI--KYVPLLGWFMALGNNVFIDRKNRGH----A--LET---MAKVAVYLKEHKYGL--WLF…
	A0A0L0T0Z6	AGPAT	Allomyces macrogynus	Fungi	------------------------------------------------------------------------------------------------------------------------------MNL--------------------FA-----SLIFITYVALSLLARLNLAPRAVQYY-IKLTHYGLVT--VVAATYGLLLALFAK--------------LF-----DKDLRLDISYYVGR----VMVTLG-------SIVLGVDCVV-----SGGEFL------ENPEFQAVLVGNHQATLDMITMSA----I--FPR-----HCTVMAK-KSL--RAVPVLGAFMAATHAVFVDRGNSAK----A--RQA---MDKAIKEMNAKKLSL--FVY…
	A0A1R1X9L0	AGPAT	Smittium culicis	Fungi	-----------------------------------------------------------------------------------------------------------------------------MGAIVT-------------YT------------L-YFLGAQVSMNLLSKLNDKIEFV-TKTINFVLIT--FVSAVVSISCSPYLI--------------LT-----NQR--SSLNWLTGR----TFSHLS-------KLILGISVEI-----ENPELL------EE-NKPYVFVGNHQSFVDLVWLGV----V--FPK-----NAVILAK-KVI--KYYPLLGWFMILADDIFISRGVKQS----T--KEM---FKKASEDLLRKKNCV--FFF…
	A0A197K8I3	AGPAT	Mortierella elongata	Fungi	-----------------------------------------------------------------------------------------------------------------------------MSSEST-------IP----WCI-IT------TPV--FILALPR--LLAVLPQKIQFV-TKCCIVLIAT--FIMSIVGCFVAIVFA--------------LL-----RRR--HEINFVVAR----IFSFIA-------SYPCGVTFKV-----VGEEHL------EK--YPAIVVCNHQSSMDMMILGR----V--FPK-----HCVVMAK-KEL--QYFPFLGIFMTLSNAIFIDRKNHKK----A--IES---TTQAVTDMKKHNSGI--WIF…
	A0A367KA60	SLC1_2	Rhizopus azygosporus	Fungi	----------------------------------------------------------------------------------------------------------------------------------------------------MLA-----TPLIMTIVILPL--LLLLLRKFNGFY-YRSIMTVVSL--TIMATYGMIAALIFP--------------VF-----GYT--QYINFTVAR----GHYYIT-------KFFCGIKVVP-----EGLEHL------EE-KSPVIFVCNHQSSMDIMLFGA----F--YPK-----NTSIVAK-KEI--KYYPFLGWYMRLSNAIFLDRKNREN----A--IKE---ARKASEDIRRKGVNV--WVF…
	A0A2N1MV30	AGPAT	Rhizophagus irregularis	Fungi	------------------------------------------------------------------------------------------------------------------------------MKLDV-------VP----VRP-LA------TAI--IIAAL-Y--TGSRVNNTIQFG-VRAFISIIFL--LIFSAYGSLIAIIFS--------------II-----GKR--GLINFVTAR----TYGYFA-------STAVGISFKV-----QGEEYL------NT--RPAIFICNHQAAVDLLVLGR----I--FPK-----HCVVVGK-ASL--RFIPLLGMFMSLGHAVFLDRKNHGS----A--VQA---LTNAAEEIKKQNTSV--FIF…
	A0A2N1JAP2	SLC1_1	Malassezia vespertilionis	Fungi	-------------------------------------------------------------------------------------------------------------------------------------------M----WGA--LA-----SV---VAVALGALTFASARSSVARYY-LNSSLYVFSM--GLSSTLGIVYSVMLS--------------IA-----GKR--LNTNAWVAA----TFYFLI-------HHLIGFRITM-----DGEQYL------EE--RPIILVGNHQSVLDIFYLGK----I--MRE-----RTVIMAK-KEL--RWVPLLGQFMMLGGNIFIDRKSRAS----A--IKT---MNEAGEYMHKNKIAL--FAF…
	A0A1Y2FM52	AGPAT	Protomyces lactucaedebilis	Fungi	------------------------------------------------------------------------------------------------------------------------------MALST------YFG----YTG-----------L--AFFTFAL--LGPR-FKATRFI-ARYATAIVTM--IVCASYGVLASLVFK--------------VI-----GLK--SLSQWTVAR----SFDLLL-------SPMLGISFTV-----ENEERM------ST--RPAIFISNHQTELDVLMLGR----M--FPK-----HTSVTSK-KEL--KYMPFLGQFMTLSGTVFIDRANRKN----A--VAS---FDTAVRQIKEEKQNV--WIF…
	P33333	SLC1	Saccharomyces cerevisiae	Fungi	----------------------------------------------------------------------------------------------------------------------------------------------------------------------------MSVIGRFLYY-LRSVLVVLAL--AGCGFYGVIASILCT--------------LI-----GKQ--HLAQWITAR----CFYHVM-------KLMLGLDVKV-----VGEENL------AK--KPYIMIANHQSTLDIFMLGR----I--FPP-----GCTVTAK-KSL--KYVPFLGWFMALSGTYFLDRSKRQE----A--IDT---LNKGLENVKKNKRAL--WVF…
	M2XX36	AGPAT	Galdieria sulphuraria	Plantae	---------------------------------------MSPCFLFSFYSRLC-----------------VPSVSTVYVSTQQSTRIC-------LQPVVFYSGPFPSLRRAYLHKI---VLKSTTSSRPWCEKFNLAMK----QSS----------------EVKK----KRFSVFGVFFL-IVTYLWAV----ILFPV--FT--------------ALFPVTLLLD---RV--RRRLLDRFAMLWMRLTLFCC-----------RLQVVI-----QGEENL-----PRS-DEVVMYVANHQSYLDIYVLSA-------LKR-----KFKFVSK-IEV--FSYPVIGWAMALAGYVGLKRGDSRR----Q--LQT---YHEI-VRKLQSGVSL--VMF…
	A8J0J0	AGPAT	Chlamydomonas reinhardtii	Plantae	--------------------------------MARKSSL------AQA--------AIERKPVLLRPQLNVPRMSGITA-------LP-----MERRPLP-V-APSPSAKPELPARS-----------ALVCHAAAASVP----LPNSDSAP-----------QPNV----LLAKIRAIMFF-AWSFLLSL----PLFVT--MM--------------VMAPLVLAFD---KY--RRLAQHFVNNLWACASTAP------------FYKVTI-----IGRENL-----PPP-DKPVVYVANHQSFLDIYSLFH-------LQR-----PFKFISK-TSN--FLIPIIGWSMFLTGHVMINRVDRRS----Q--LKC---LQQC-RDLLAEGAPV--LFF…
	A0A388L0K2	AGPAT	Chara braunii	Plantae	---------------------------------------MHTALCDDDYPRRCACGDDHSGS-ILQSSFKSPPLSPFGNY------------------IRA----DWHLRPKYPRKP-----------LVTCQVANQALP----DPSGAVRIPFT--PSASAIGGFA----LGARLWALCFY-LTTAVIGC----GLFVV--MI--------------VLYPFVMVLD---RK--SRRIFHSINALWANLTAQW------------FYKTEI-----YGLENL-----PGP-GEPAVYVANHQSFLDIYTTFQ-------LNR-----PFKFISK-STI--FLIPIIGWAMYLTGHVPLKRMDNKS----Q--VEC---LRRC-YELLTERVPI--FFF…
	A0A2R6W390	AGPAT	Marchantia polymorpha	Plantae	MASMMVHA------------------LPF-SPLAAKSGVISRRSIAPPS-----CARLTTGS-ALCLKQKTPKMSAIQST----QFLS-----GEGINFLKLGVTRSRYHQRSASQL-----------GVRCQVAGAAVP----DESS-SRIH----DYLPNFTDKS----LPLKLRALCFY-LWTYVLAV----PLFAV--MA--------------VLQPFVLLFD---KQ--RRTAHHFVNRIWATLTTSL------------FYKVEI-----EGLENL-----PGP-NEAAVYVANHQSFLDIYTLFM-------LGR-----SFKFISK-TSN--FLIPIIGWSMYLTGHVPLRRMDKRS----Q--LEC---LKKC-LDLVKNGVPV--LFF…
	A0A2K1L2E5	AGPAT	Physcomitrella patens	Plantae	---MMVACRTGRVGPGITRPSIVSRSESFRQPLVAAYGLAGASRLDSTSKSSRPLSGLGTRS-VTQVS-LSSSHSSLQGS----LALQ-----AHHKVLYHLGH----VCEERNRNA-----------GIRCHAAAASSA----QGGAAFEPD----AAAPPASDVN----LAQKVRAILFY-LTTFAVAI----PLFVV--ML--------------ILQPFVLLLD---KQ--RRRAQHLVNKVWAILTTSL------------FYKTEI-----EGWENL-----PAS-DEGAVYVANHQSFLDIYTLFQ-------LGR-----PFKFISK-TSN--FLIPIIGWSMYMTGHIPLKRMDKRS----Q--LEC---LKTC-MKLVKEGVSV--LFF…
	Q41745	PLS1	Zea mays	Plantae	---MDVAS----------ARSISSHPSYYGKPICSSQSS----LIRISRDKVCCFGRISNGMTSFTTSLHAVPSEKFMGETR-RTGIQWSNRSLRHDPYRFLDKKS-PRSSQLARDI-----------TVRADLSGAATP----DSS-------------FPEPEIK----LSSRLRGIFFC-VVAGISAT----FLIVL--MI--------------IGHPFVLLFD---PY--RRKFHHFIAKLWASISIYP------------FYKINI-----EGLENL-----PSS-DTPAVYVSNHQSFLDIYTLLS-------LGK-----SFKFISK-TGI--FVIPIIGWAMSMMGVVPLKRMDPRS----Q--VDC---LKRC-MELLKKGASV--FFF…
	Q8GXU8	LPAT1	Arabidopsis thaliana	Plantae	-----------------------------------------------------------------------------------------------------------------------------------------MVI-------AAA-----------VIVPL----GLLFFISGLAVN-----------------LFQAV-CYV----------LIRPLS--------KNTYRKINRVVAETLWLELVWIV-------DWWAGVKIQV-----FADNE--TFNR--MGKEHALVVCNHRSDIDWLVGWILAQRSGCLG------SALAVMK-KSS--KFLPVIGWSMWFSEYLFLERNWAKD-------EST---LKSGLQRLSDFPRPFWLALF…
	Q8LG50	LPAT2	Arabidopsis thaliana	Plantae	------------------------------------------------------------------------------------------------------------------------------------M----KIP-------AAL-----------VFIPV----GVLFLISGLIVN-----------------IIQLV-FFI----------IVRPFS--------RSLYRRINKNVAELLWLQLIWLF-------DWWACIKINL-----YVDAE--TLEL--IGKEHALVLSNHRSDIDWLIGWVMAQRVGCLG------SSLAIMK-KEA--KYLPIIGWSMWFSDYIFLERSWAKD-------ENT---LKAGFKRLEDFPMTFWLALF…
	Q9SYC8	LPAT3	Arabidopsis thaliana	Plantae	------------------------------------------------------------------------------------------------------------------------------ME-VCGD----LKS-------DNL-----------KNRPL----TPLRILRGLMILL--VFLSTAFM--FL-------LYFA----------PIAALGLRLL---SVQQSRKVVSLIFGLWLALWPYLF-------ETVNGTTVVF-----SGDII--------PVEKRVLLIANHRTEVDWMYLWNIALRKGCLG------YIKYVLK-SSL--MKLPIFGWGFHVLEFIPVERKREVD-------EPV---LLQMLSSFKDPQEPLWLALF…
	Q8L4Y2	LPAT4	Arabidopsis thaliana	Plantae	------------------------------------------------------------------------------------------------------------------------------ME-VCGD----LKS-------DNL-----------KNRPL----TPLRILRGLMILL--VFLSTAFM--FL-------LYFA----------PIAALGLRLL---SVQQSRKVVSLIFGLWLALWPYLF-------ETVNGTTVVF-----SGDII--------PVEKRVLLIANHRTEVDWMYLWNIALRKGCLG------YIKYVLK-SSL--MKLPIFGWGFHVLEFIPVERKREVD-------EPV---LLQMLSSFKDPQEPLWLALF…
	Q9LHN4	LPAT5	Arabidopsis thaliana	Plantae	------------------------------------------------------------------------------------------------------------------------------------M----EKK-------SVP-----------NSDKL----SLIRVLRGIICLM--VLVSTAFM--ML-------IFWG----------FLSAVVLRLF---SIRYSRKCVSFFFGSWLALWPFLF-------EKINKTKVIF-----SGDKV--------PCEDRVLLIANHRTEVDWMYFWDLALRKGQIG------NIKYVLK-SSL--MKLPLFGWAFHLFEFIPVERRWEVD-------EAN---LRQIVSSFKDPRDALWLALF…
	A0A0H5R611	AGPAT	Spongospora subterranea	Protista	------------------------------------------------------------------MEQWPKSLSPFEEDIRAA--LL----------------PGSSSRN----KM-------EMCARLELM----IEN----ESLS--------EADIEVIRDIESRLDLRKQIRPVLKF-STATIVVLKI--IICVCVAI--IIAPF------EIIASVLTLFNP-IWAKLNLKKNNLPTEMLQLLTFRWGA--------LCFGLEVHV-----EGKNNV-------P-DVPVVFMYSHASNLDPLAIGA----V--APC-----PLRFIGK-KAI--FLIPLFGWLFMLYGHIPIDRHNRES----A--IES---LKSAARSVRRSKASI--AIS…
	Q8IL28	AGPAT	Plasmodium falciparum	Protista	-------------------------------------------------------------------------------------------------------------------------------------------------------------MEIDVKKKYKHSNILIRLILTIYIY-IVMFLTLSFS--LICQLSSLVIFFPLFLYS--KKAKLYILGLCIQ-------------------FGAYLLCS-------FINPFWKLVI----IRKSKKK------YE-PTNTILFINHLSSVDPWVVNA---TT--FPW-----PIKFVFK-SSL--LKVPIGGQALYFSGSIPLHFTKDKGGWGVK--QGEVQKIMNICKEYQDMNIPL--AIF…
	D8LTF6	AGPAT	Ectocarpus siliculosus	Protista	----------------------------------------------------------------------------------------------------------------MTHSL---------GLGSTAVGAGETLPTATAQHGSPSARTFDRSNLGFHLKIGS----KVINMYGLLFA-TQAWFTAL----LMFPL--CF--------------VSALVAPIFD---WR--RMRPPTAIAVMWGRLALWNM-----------GVRPEV-----EGAELL-----PPR-GEAVVFVANHGSYLDIPVTNY-------LPR-----MCKYLMK-AEL--LWLPIVGWKAVLARDIFVHRGTSTT----F--RQL---LRST-TRTLKAGNSI--MTF…
	A0A0S4IXV9	AGPAT	Bodo saltans	Protista	---------------------------------------------------------------------------------------------------------------------------------------------------------------MDFLKYPKVR---SLDIYNMSTF---------LQ--NICSVIRMTAFISSFAFIQVITLLMAPLTILNP-FLRRCGVIEKNLPTNQVLPILARFV--------LFSSGVRLNV-----NDQSK-------KV-TSKVIYMYNHTSNLDPVIVMS----T--AAC-------KFIYK-KEL--MYVPIFGWAMLAYKHIAIDRKNRAQ----A--IES---LNRAVKSVVEKKQNV--AIS…
	M7WSS7	AGPAT	Entamoeba histolytica	Protista	------------------------------------------------------------------------------------------------------------------------------------M----VDT-------TNI-----------THKIV----LILKYYFA-YCFVASVFLQITVL--LIMDVICLPLYFI----------YRPIYQWIFQ--RVT----EVYMMYFPLIF--------------YYIIGNRIIE-----TGDEL--------IPNENALFLCNHTHFYDFLPIVIEAPRCGRIG------AMRFFMK-EEI--SKIPLVGFGFYMMDSVYLKRNFQDD-------KPY---ILETFKRFRNKYYPFWLTIY…
	A0A0L0DDR9	PLS1	Thecamonas trahens	Protista	---------------------------------------------------------------------------------------------------------------------------------------------------------------------M----GMLYKAAG-LCLWSLIWIEAIVM--AIV-------TFT----------IVSPLSWLLG--GRIGHARTLNAMVDRLIWYHMVWML-------EVWGGSRIEF-----YGDEL--------PLRESALLISNHIFLADFWPFFSLALRKGRLG------CIKIFSK-NNV--KYLPGFGWGAWLMGFVFIRRNWTQD-------ADL---IRNTFANLKATGLPIWLLSH…
	A0A0D2WKW1	AGPAT	Capsaspora owczarzaki	Protista	-------------------------------------------------------------------------MPA----------------------------AATTNRRAAGSTSNGGSGSNASKG-LWTR----VCE-------SGI-----------PGVFF----GLVFLISGLAVN-----------------VLQLA-S-L----------LLWPVS--------PLLYRRFNHTIIQIHWSEMIWVA-------EWWAGIKVVL-----SSSSRKALEAS--IGVDQGVALCNHRSDVDWLFGLVLAEKYNCLG------GAKAYMK-GNT--KFLPILGWSWWFLEFVFLSRAWDKD-------QSK---LASACKSLDGFPLPFWMVIF…
	F2UT01	AGPAT	Salpingoeca rosetta	Protista	------------------------------------------------------------------------------------------------------------------------------MGKEE-R----AAP----AAAAETA-----AAT--AATSTATAVAKPGLLRKIKFY-VKFTLGISVF-LILLFLVVVPITVVRR--------------LL-----GIQRGLPADLLWIP------GEAS-------LPFIGVKYKL-----EGRVDL-----IRSGHQPYIFVLNHQSQLDSMVMAT----N--VPT-----DMVIVAK-RSL--LLMPGIGFILWLTDAILIDRKNHAS----S--VAS---MAAAAQRVTNDKLSV--AVF…
					: .* : :.
	TABLE 1. Sequence alignment of LPAAT enzymes from different species belonging to the different biological kingdoms. Multiple sequence alignment was carried out using the web version of the Clustal Omega software (Sievers et al., 2011) at http://www.ebi.ac.uk/Tools/msa/clustalo. Human LPAATδ/AGPAT4 is shown in grey background. Catalytic motifs (Motifs I-IV) are shown with the conserved amino acid …
