# Supplementary material for: The Structure and Function of Acylglycerophosphate Acyltransferase 4/ Lysophosphatidic Acid Acyltransferase Delta (AGPAT4/LPAATδ)
Source: Front Cell Dev Biol. 2019 Aug 2;7:147. doi: 10.3389/fcell.2019.00147 (PMC6688108; doi:10.3389/fcell.2019.00147)
Supplement: Supplementary file 2 [file Table_2.xlsx]

## Sheet: Foglio1
	Accession number	Binomial name	Common name	Motif I Motif II Motif III Motif IV NHxxxxD (F/Y)xxR EGTR
	Q9NRZ5	Homo sapiens	human	---MDLAGLLKSQFLCHLVFCYVFIASGLIINTIQLFTLL-L------WPINKQLFRKINCR---------L-SYCISSQLVMLLEWWSGTECTIFTDPRA----YL-KYGKENAIVVLNHKFEIDFLCGWSLSERFG-LLGGSKVLAKKELAYVPIIGWMWYFTEMVFCSRKWEQDRKTVATSLQHLRDYPEKYFF--LIHCEGTRFTEKKHEISMQVA---RAKGLPRLKHHLLPRTKGFAITVRSLRNV--VSAVYDCTLNFRNNE--NPTLLGVLNGKKYHADLYVRR--IPLE-DIPEDD-DECSAWLHKLYQEKDAFQEEYYRTGTFPET--------------PMVPPRRPWTLVNWLFWASLVLYPFFQFLVSMIRSGSSLTLASFILVFF…
	G7MR08	Macaca mulatta	macaque	---MDLAGLLKSQFLCHLVFCYVFIASGLIINTVQLFTLL-L------WPINKQLFRKINCR---------L-SYCISSQLVMLLEWWSGTECTIFTDPRA----YP-KYGKENAIVVLNHKFEIDFLCGWSLSERFG-LLGGSKVLAKKELAYVPIIGWMWYFTEMVFCSRKWEQDRKTVATSLQHLRDYPEKYFF--LIHCEGTRFTEKKHEISMQVA---RAKGLPRLKHHLLPRTKGFAITVRSLRNV--VSAVYDCTLNFRNNE--NPTLLGVLNGKKYHADLYVRR--IPLE-DIPEDD-DRCSAWLHKLYQEKDAFQEEYYRTGTFPET--------------PMVPPRRPWTLVNWLFWASLVLYPFFQFLVSMIRSGSSLTLASFILVFF…
	U3DG12	Callithrix jacchus	common marmoset	---MDLVGLLKSQFLCHLVFCYVFIASGLIINTMQLFTLL-L------WPINKQLFRKINCR---------L-SYCISSQLVMLLEWWSGTECTIFTDPRA----YP-KYGKENAIVVLNHKFEIDFLCGWSLSERFG-LLGGSKVLAKKELAYVPIIGWMWYFTEMVFCTRKWEQDRKTVATSLQHLRDYPEKYFF--LIHCEGTRFTEKKHEISMQVA---RAKGLPSLKHHLLPRTKGFAITVRSLRNV--VSAVYDCTLNFRNNE--NPTLLGVLNGKKYHADLYVRR--IPLE-DIPEDD-AKCSAWLHKLYQEKDAFQEEYYRTGTFPET--------------PMVPPRRPWTLVNWLFWASLMLYPFFQFLVSMIRSGSSLTLASFILVFF…
	XP_008058314.1	Carlito syrichta	tarsier	---MDLAGLLKSQFLCHLVFCYVFIASGLMINAVQLLTLV-L------WPINKQLFRRINCR---------L-SYCISSQLVMLLEWWSGTECTIFTDPQA----YT-KYGKENAIVVLNHKFEIDFLCGWSLAERFG-LLGGSKVLAKKELAYVPIIGWMWYFTEMVFCTRKWEQDRKTVATSLQHLRDYPEKYLF--LIHCEGTRFTEKKHQISMQVA---QAKGLPGLKHHLLPRTKGFAVTVRSLRNV--VSAVYDCTLNFRNNE--NPTLLGVLNGKKYHADMYVRR--IPLE-DIPEDD-DRCSAWLHKLYQEKDAFQEEYYRTGTFPET--------------PMVPPRRPWTLLNWLFWASLLLYPFFQFLVSMVSSGSSLTLASFVLVFF…
	H0WQ63	Otolemur garnettii	galago	---MDLVGLLKSQFLCHLVFCYVFIASGLIVNTIQLLTLV-L------WPINKQLFRRINCR---------L-SYCISSQLVMLLEWWSGTECTIFSDPQA----YT-KYGKENAIVVLNHKFEIDFLCGWSMAERFG-LLGGSKVLAKKELAYVPIIGWMWYFTEMVFCTRKWEQDRKTVATSLLHLRDYPEKYLF--LIHCEGTRFTEKKHRISMQVA---QAKGLPSLKHHLLPRTKGFVITVRSLRNV--VSAVYDCTLNFRNNE--NPTLLGVLNGKKYHADLFVRR--IPLE-NIPEDE-DQCSAWLHKLYQEKDAFQEEYYRTGTFPGS--------------PLVPPRRPWTLVNWLFWASLLLCPFLQFLVSMVSSGSSLTLASFVLVFF…
	XP_008572825.1	Galeopterus variegatus	flying lemur	---MDLVGLLKSQFLCHLVFCYVFIASGLIINSIQLCTLV-L------WPINKQLFRRINCR---------L-SYCISSQLVMLLEWWSGTECIIYTDPRA----YP-KYGKENAIVVLNHKFEIDFLCGWSLAERFG-LLGGSKVLAKKELAYVPIIGWMWYFTEMVFCTRKWEQDRKTVATSLLHLRDYPEKYLF--LIHCEGTRFTEKKHQISMQVA---QAKGLPSLKHHLLPRTKGFGVTVRSLRNV--VSAVYDCTLNFRNNE--NPTLLGVLNGKKYHADMYVRR--IPLE-DIPEDE-DKCSAWLHKLYQEKDAFQEEYYRTGTFPET--------------PLVPPRRPWTLVNWLFWASLLLYPFFQFLVSMVSSGSSLTLASFVLVFF…
	XP_006152312.1	Tupaia chinensis	treeshrew	---MDLIGLLKSQFLCHLVFCYVFIASGLIINTIQLFTLV-L------WPINKQLFRKINCR---------L-SYCISSQLVMLLEWWSGTECTIYTDPRA----FP-KYGKENAIVVLNHKFEIDFLCGWSLAERFG-VLGGSKVLAKKELAYVPIIGWMWYFTEMVFCTRKWEQDRKTVSTSLLHLRDYPEKYLF--LIHCEGTRFTDKKHQISMQVA---QAKGLPSLKHHLLPRTKGFAVTVRSLRNV--VSAVYDCTLNFRNNE--NPTLLGVLNGKKYHADMYVRR--IPLE-DIPEDD-DRCSAWLHKLYQEKDAFQEEYYRTGTFPET--------------PLVPPRRPWTLLNWLFWASLLLYPFLQFLVSMVRSGSSLTLASFVFLIS…
	H0V738	Cavia porcellus	guinea pig	---MDLIALLKSQFLCHLIFFYVFIASGLIVNIIQLFTLV-L------WPINKQLFRKINCR---------L-SYCISSQLVMLLEWWSGTECTIYTDPHA----YP-KYGKENAIVILNHKFEIDFLCGWSLSERLG-ILGNSKVLAKKELAYVPIIGWMWYFTEMIFCTRKWEQDRQTVAKSLLHLRDYPEKYLF--LIHCEGTRFTEKKHQISMQVA---QAKGLPSLKHHLLPRTKGFAITVKCLRGV--VPAVYDCTLNFRNNE--NPTLLGVLNGKKYHADCYVRR--IPME-DIPDDD-DQCSVWLHKLYQEKDAFQEEYYRTGIFPET--------------PKVPPRRPWALLNWLFWASLLLYPFFRFLVSMVSSGSSVTLASFIIVFC…
	Q8K4X7	Mus musculus	mouse	---MDLIGLLKSQFLCHLVFCYVFIASGLIVNAIQLCTLV-I------WPINKQLFRKINAR---------L-CYCVSSQLVMLLEWWSGTECTIYTDPKA----CP-HYGKENAIVVLNHKFEIDFLCGWSLAERLG-ILGNSKVLAKKELAYVPIIGWMWYFVEMIFCTRKWEQDRQTVAKSLLHLRDYPEKYLF--LIHCEGTRFTEKKHQISMQVA---QAKGLPSLKHHLLPRTKGFAITVKCLRDV--VPAVYDCTLNFRNNE--NPTLLGVLNGKKYHADCYVRR--IPME-DIPEDE-DKCSAWLHKLYQEKDAFQEEYYRTGVFPET--------------PWVPPRRPWSLVNWLFWASLLLYPFFQFLVSMVSSGSSVTLASLVLIFC…
	XP_008261974.1	Oryctolagus cuniculus	rabbit	---MDLAGLLKSQFLCHLVLCYVFIASGLIINTTQLLTLV-L------WPINKQLFRKINCR---------L-SYCISSQLVMLLEWWSGTECTIYTDPQA----YP-LYGKENAIVVLNHKFEIDFLCGWSLAERFG-ILGNSKVLAKKELAYVPIVGWMWYFTEMIFCSRKWEQDRKTVATSLLHLRDYPEKYLF--LIHCEGTRFTEKKHQISMQVA---RAKGLPSLKHHLLPRTKGFAVTVRCLRDV--VSAVYDCTLNFRNNE--NPTLLGVLNGKKYHADFYVRR--IPMA-EIPEDE-DQCSAWLHKLYQEKDAFQEEYHRTGIFPET--------------PRVPPRRPWAIINWLFWASLLLYPFFQFVVNTVSSGSSLTLASFLLVFF…
	A0A1S3APM7	Erinaceus europaeus	hedgehog	---MGLVALLKAHFLCQLAFCYVFVASGLIVNALQVLTLP-L------WPLSRRLFRKINCRL----------SYCVSSQLVMLLEWWSGTDCVIHTDPSA----YA-KFGKENAIVVLNHKFEIDFLCGWSLAERFG-VLGASKVLAKQELAYVPIIGWMWRFTEMVFCARRWELDRTAVARSLERLRDYPDKYFF--LIHCEGTRFTEKKHRVSMEVA---AAKGLPPLKHHLLPRTKGFTITVKSLRDV--VSAVYDCTLNFRDHE--TPTLLGVLQGRKYHADLHVRR--IPLE-QVPEDE-EQCSAWLHRLYQQKDALQEQYLRHGRFPGS--------------PMCPPRRPWALLTWGCWAVLLLGPLLRLLVTSLSAGALLPLAGLGLLLT…
	L5KEH8	Pteropus alecto	flying fox	---MDLAGLLKSQFLCHLVFCYVFIASGLIVNTIQLFTLL-L------WPINKQLYRRINCR---------L-SYCISSQLVMLLEWWSGTECVIHTDPQA----YP-KFGKENAIVVLNHKFEIDFLCGWSLAERFG-VLGGSKVLAKKELAYVPIIGWMWYFTEMVFCTRKWEHDRKTVAKGLLRLRDYPEKYFF--LIHCEGTRFTEKKHQISMQVA---QAKGLPGLKHHLLPRTKGFAITVRGLRDV--VSAVYDCTLNFRNNE--NPTLLGVLNGKKYHADLYVRR--IPLE-EVPEDG-DECAAWLHKLYQEKDALQEEYCRTGTFPGT--------------PMVPPRRPWALLNWLFWASLLLCPFVRFLVSMVSSGSSLTLASFVLVLF…
	XP_017525536.1	Manis javanica	pangolin	-----------------------------------------M------PPTPPHCLEEISAAIEATFYPVVMNYPFVLAELVMLLEWWSGTECVIHTDPRA----YP-KYGKENAIVVLNHKFEIDFLCGWSLAERFG-VLGGSKVLAKKELAYVPIIGWMWYFTEMVFCTRKWEQDRKTVSQSLLRLRDYPEKYFF--LIHCEGTRFTEKKHQISMQVA---QAKGLPSLKYHLLPRTKGFTITVRSLRNV--VSAVYDCTLNFRNNE--NPTLLGVLNGKKYHADLYVRR--IPLE-EVPEDE-DRCSTWLHKLYQEKDAFQEEYYRTGTFPET--------------PLVPPRRPWTLVNWLVWASLLLYPFFRFLSNMISSGSSLTLASFVLVFF…
	XP_006932193.1	Felis catus	cat	---MDLLGLLKSQFLCHLVFCYVFIASGLIINTVQLFTLL-L------WPINKQLFRRINCR---------L-SYCVSSQLVMLLEWWSGTECIIHTDPQA----YP-KYGKENAIVVLNHKFEIDFLCGWSLAERFG-VLGGSKVLAKKELAYVPIIGWMWYFTEMVFCTRKWEQDRKTVSQSLLHLRDYPEKYFF--LIHCEGTRFTEKKHQISMQVA---RAKGLPSLKYHLLPRTKGFAVTVRSLRNV--VSAVYDCTLNFRNNE--NPTLLGVLNGKKYHADLYVRR--IPLE-EVPEDE-DECSAWLHKLYQEKDAFQEEYYRTGTFPET--------------PMVPPRRPWTLINWLFWASLLLYPFFRFLTNMISSGSSLTLASFVLVFF…
	XP_006932193.1	Felis catus	cat	---MDLVGLLKSQFLCHLVFCYVFIASGLIINTIQLFTLL-L------WPINKQLFRKINCR---------L-SYCVSSQLVMLLEWWSGTECVIHTDPQA----YP-KYGKENAIVVLNHKFEIDFLCGWSLAERFG-VLGGSKVLAKKELAYVPIIGWMWYFTEMVFCTRKWEQDRKTVSKSLLHLRDYPEKYFF--LIHCEGTRFTEKKHQISMQVA---QAKGLPSLKYHLLPRTKGFAITVRSLRNV--VSAVYDCTLNFRNNE--NPTLLGVLNGKKYHADLYVRR--IPLE-EVPEDE-DECSAWLHKLYQEKDAFQEEYYRTGTFPET--------------PMVPPRRPWTLINWLFWASLLLYPFFRFLINMISSGSSLTLASFVLVFF…
	F6Y4T4	Canis lupus familiaris	dog	---MDLVGLLKSQFLCHLVFCYVFIASGLIINTIQLFTLI-L------WPINKQLFRKINCR---------L-SYCISSQLVMLLEWWSGTECIIHTDPRA----YP-KYGKENAIVVLNHKFEIDFLCGWSLAERFG-VLGGSKVLAKKELAYVPIIGWMWYFTEMVFCTRKWEQDRKTVAKSLLHLRDYPEKYFF--LIHCEGTRFTEKKHQISMQVA---HAKGLPSLKYHLLPRTKGFAITVRSLRNV--VSAVYDCTLNFRNNE--NPTLLGVLNGKKYHADLYVRR--IPLE-EVPEDE-DKCSAWLHKLYQEKDAFQEEYYRTGTFPET--------------PMVPPRRPWTLVNWLFWASLLLYPFFRFLVNMISSGSSLTLASFVLVFF…
	F6W9J9	Equus caballus	horse	---MDLVGLLKSQFLCHLVFCYVFIASGLIVNTIQLLTLL-L------WPINKQLFRKINCR---------L-SYCVSSQLVLLLEWWSGTECVIYTDPQA----YP-KYGKENAIVVLNHKFEIDFLCGWSLAERFG-VLGGSKVLAKKELAYVPIIGWMWYFTEMVFCTRKWEQDRKTVSKSLLHLRDYPEKYFF--LIHCEGTRFTEKKHQISMQVA---QAKGLPSLKHHLLPRTKGFAVTVRSLRNV--VSAVYDCTLNFRNNE--NPTLLGVLNGKKYHADLYVRR--IPLE-EVPEDE-AECSAWLHKLYQEKDAFQEEYARTGTFPET--------------PMVPPRRPWTLVNWLFWASLLLYPFFRFLVNMVSSGSSLTLAGVILLFF…
	XP_010975047.1	Camelus dromedarius	camel	---MDLVALLKSHFLCHLIFCYVFIVSGLIINTIQLCTLL-L------WPVNKQLFRKINCR---------L-SYCVSSQLVMLLEWWSGTECVIYTDPRA----YP-KYGKENAIVVLNHKFEIDFLCGWSLAERFG-VLGGSKVLAKKELAYVPIIGWMWYFTEMVFCTRKWEQDRKTVSESLLHLRDYPEKYFF--LIHCEGTRFTEKKHQISMQVA---QAKGLPSLKHHLLPRTKGFAVTVRSLRNV--VSAVYDCTLNFRNNE--NPTLLGVLNGKKYHADLYVRR--IPLE-EVPEEE-DKCAAWLHKLYQEKDAFQEEYSRTGTFPET--------------PVVPPRRPWTLVNWLFWASMLLYPFFRFVINMVSSGSSLTLASFVLVFF…
	Q5E9R2	Bos taurus	cattle	---MGLIALLKSQFLCHLIFCYVFIASGLIINTIQLFTLL-L------WPINKQLFRKINCR---------L-SYCISSQLVMLLEWWSGTECVIHTDPRA----YP-KYGKENAIVVLNHKFEIDFLCGWSLAERFG-VLGGSKVLAKKELAYVPIIGWMWYFTEMVFCTRRWEQDRKTVSESLLHLRDYPEKYFF--LIHCEGTRFTEKKHQISMQVA---QAKGLPSLKHHLLPRTKGFAITVRSLRNV--VSAVYDCTLNFRNNE--NPTLLGVLNGKKYHADLYVRR--IPLG-EVPEDE-DRCAAWLHKLYQEKDALQEEYSRTGTFPGT--------------PMVPPRRPWTLINWLFWASLLLYPFFRFLVNMVSSGSSLTLASFVLVFF…
	A0A2Y9SIF1	Physeter catodon	sperm whale	---MDLVGLLKSQFLCHLVFCYVFIASGLIVNALQLCTLV-L------WPVNKQLFRKINCRL----------SYCISSQLVMLLEWWSGTECTLYTDPRD----YP-KYGKESAIVVLNHKFEIDFLCGWTLAERFG-VLAASKVLAKKELAYVPIIGWMWYFLEMVFCKRKWEEDRKTVLKSLLSLRDYPEKFFF--LIHCEGTRFTEKKHQISMQVA---KAKGLPGLKYHLLPRTKGFAVTVRSLRNV--VSAVYDCTLNFRNNE--NPTLLGVLNGKKYHSDLYVRR--IPLE-EVPEDE-DKCATWLHKLYQEKDAFQEEYQRRGVFPET--------------PMVPPRRPWTLLNWLFWASLLLYPFFRFLVSMVSSGSSLTLASFVLVFF…
	XP_007943472.1	Orycteropus afer afer	aardvark	---MDLTGLLKSQFLCHLVFCYVFTASGLIVNALQLCTLP-L------WPINKQLFRKINCRL----------SYCISSQLVMLLEWWSGTECTLYTDPQD----YP-RYGKENAIVVLNHKFEIDFLCGWTLAERFG-VLSSSKVLAKKELAYLPIIGWMWYFLEMVFCKRKWEEDRKTVLNSLLNLRDYPEKFFF--LIHCEGTRFTEVKHQISMQVA---KTKGLPGLKHHLLPRTKGFAVTVRSLRNV--VSAVYDCTLNFRDHE--NPTLLGILNGKKYHADFYVRR--IPLE-DVPEDE-EQCAAWLHKLYQEKDAFQEEYYQKGVFPET--------------PMVPPRRPWTLLNWLFWASLLLYPFFRFLINMVSSGSSLTLASLVLVFF…
	XP_004702147.1	Echinops telfairi	tenrec	---MDLAGLLKSQFPCHLIFCYVFIASGLIINSIQVCTLL-L------WPVSKQLFRRINCRL----------SYCISSQLVMLLEWWSGTECTLYTDPRD----YP-KYGKESAIVVLNHKFEIDFLCGWTLAERFG-LLPASKVLAKKELAYVPIIGWMWYFLEMVFCKRKWEEDRKTVLKSLLNLRDYPEKFFF--LIHCEGTRFTEKKHQISMQVA---KAKGLPSLKYHLLPRTKGFAVTVRSLRNV--VSAVYDCTLNFRNNE--NPTLLGVLNGKKYHSDLYVRR--IPLE-DVPEDE-DKCAAWLHKLYQEKDAFQEEYYRRGVFPET--------------PMAPPRRPWTLLNWLFWASLLLYPFFRFLVSMVSSGSSLTLASFVLVFF…
	G5E780	Loxodonta africana	elephant	---MDLIGFLKSQFLCHLVFCYVFIASGLIINTIQLFTLI-L------WPINKQLFRKINCR---------L-SYCISSQLVMLLEWWSGTECTLYTDPRD----YP-KYGNENAIVVLNHKFEIDFLCGWSLSERFG-VLGASKVLAKKELAYVPIIGWMWYFLEMVFCTRKWEEDRKTVLKSLLNLRDYPEKYFF--LIHCEGTRFTEKKHQISMQVA---KAKGLPSLKYHLLPRTKGFAVAVRSLRNV--VSAVYDCTLNFRNNE--NPTLLGVLNGKKYHADLYVRR--IPLE-EVPEEE-DQCSAWLHKLYQEKDAFQEQYHRSGVFPDT--------------PMVPPRRPWTLLNWLFWASLLLYPFLRFLVSMVSSGSSLTLASFVLVFF…
	XP_004449866.1	Dasypus novemcinctus	armadillo	---MDLIGFLKSQFLCHLIICYIFIVSGLIINTIQLFTLV-L------WPINKQLYRKINCKL----------AYCISSQLVMLLEWWSGTQCTLYTEPKD----YG-KYGKENAIVILNHNFEIDFLCGWNFCERFG-VLGSSKVLAKKELSYVPVIGWMWYFLEIVFCSRKWEEDRETVIQGLLNLRDYPENFWF--LIHCEGTRFTQQKHQISMQVA---ESKGLPKLKYHLLPRTKGFAVTVKCLRNV--VAAVYDSTLNFKNNE--NPTLLGVLSGKKYQADLYVRR--IPLEE-VPEDE-EQCSRWLHKLYQEKDAFQEGYYRTGTYPGT--------------PIVPPRRPWTLLIWLFWALLLLYPLFQLIVNMISSGSSLTLASFALVIF…
	F7CDG3	Monodelphis domestica	opossum	---MDIIGFLKSQFLCHLIICYIFIVSGLIINTIQLFTLV-L------WPVNKHLFRKINCRL----------AYCISSQLVMLLEWWSGTQCTLYTELKD----YG-TYGKENAIVILNHNFEIDFLCGWNFCERFG-VLGSSKVLAKKELSYVPVIGWMWYFLEIVFCSRKWEEDRETVIKGLLNLRDYPENFWF--LIHCEGTRFTQQKHQISMQVA---ESKGLPKLKYHLLPRTKGFAVTVKCLRNV--VAAVYDSTLNFRNNE--NPTLLGVLSGKKYHADLYVRR--IPLEE-IPEDE-EQCSRWLHKLYQEKDAFQEGYYRTGTYPGT--------------PIVPPRRPWSLLIWLFWAVLLLYPLFQLVVNMISSGSSLTLASFALVIF…
	XP_020842416.1	Phascolarctos cinereus	koala	---MDLIGFLKSQFLCHLIICYIFIVSGLIINTIQLFTLV-L------WPINKQLFRKINCRL----------AYCISSQLVMLLEWWSGTQCTLYTEPKD----YG-KYGKENAIVILNHNFEIDFLCGWNFCERFG-VLGSSKVLAKKELSYVPVIGWMWYFLEIVFCSRKWEEDRETVIRGLVNLRDYPENFWF--LIHCEGTRFTQQKHQISMQVA---ESKGLPKLKYHLLPRTKGFAVTVKCLRNV--VAAVYDSTLNFKNNE--NPTLLGVLSGKKYHADLYVRR--IPLEE-VPEDE-EECSRWLHKLYQEKDAFQEGYYRTGTYPGT--------------PIVPPRRPWTLLCWLFWALLLLYPLFRLVVNMISSGSSLTLASFALVIF…
	XP_023359087.1	Sarcophilus harrisii	Tasmanian devil	---MDIVGFLKSQFICHLLICYIFIVSGLIINLIQLFTLM-L------WPINKQLFRRINCRL----------AYCISSQMVMLLEWWSGTSCTLYTDPES----YH-KYGKENAIVILNHNFEIDFLCGWNFCERFG-VLGSSKVLAKKELSYMPVIGWMWYFLEIVFCKRKWEEDRKTVMQKLLNLRDYPENFWF--LIHCEGTRFTEQKHQISMQVA---EAKGLPKLKYHLLPRTKGFAVTVQCLRNV--VSAVYDSTLNFRNNE--NPTLLGVLNGKKYHADLYVRW--DNKQHRHPSAA-SKNEFCFRLMSSELDAFQEEYYRTGTYPAV--------------PIVPPRRPWTLLNWLFWALLLLYPLFKLLINMVNSGSSLTLASFVFVIV…
	XP_009686661.1	Struthio camelus australis	ostrich	---MDIVGFLKSQFIFHLLICYIFIVSGLIINFIQLFTLI-L------WPINKQLFRRINCRL----------AYCISSQMVMLLEWWSGTDCTLYTDPEN----YH-KYGKENAIVILNHNFEIDFLCGWNFCERFG-VLGSSKVLAKKELSYMPIIGWMWYFLEIVFCKRKWEEDRKTVMQKLLNLRDYPENFWF--LIHCEGTRFTEQKHQASMQVA---EAKGLPKLKYHLLPRTKGFAVTVQCLRNV--VSAVYDSTLNFRNNE--NPTLLGVLNGKKYHADLYVRR--IPLEE-IPEDE-QECSNWLHRLYQEKDAFQEEYYRTGTYPAV--------------PIVPPRRPWTLLNWLFWALLLLYPLFKLLINMINSGSSLTLASFGFVIV…
	E1BY49	Gallus gallus	chicken	---MDIVGFLKSQFICHLLICYIFIVSGLIINFIQLFTLI-L------WPINKQLFRRINCRL----------AYCISSQMVMLLEWWSGTHCTLYTDPEN----YH-KYGKENAIVILNHNFEIDFLCGWNFCERFG-VLGSAKVLAKKELSYMPVIGWMWYFLEIVFCKRKWDEDRKTVMQKLLNLRDYPENFWF--LIHCEGTRFTEQKHQISMQVA---EAKGLPKLKYHLLPRTKGFAVTVQCLRNV--VSAVYDSTLNFRNNE--NPTLLGVLNGKKYHADLYVRR--IPLEE-IPEDE-QECSNWLHRLYQEKDAFQEEYYRTGTYPAV--------------PIVPPRRPWTLLNWLFWALLLLYPLFKLLINMINSGSSLTLASFAFVIV…
	A0A1V4JKY2	Patagioenas fasciata monilis	pigeon	---MDIVGFLKSQFICHLLICYIFIVSGLIINFMQLFTLI-L------WPINKQLFRKINCRL----------AYCISSQMVMLLEWWSGTDCTLYTDPES----YH-KYGKENAIVILNHNFEIDFLCGWNFCERFG-VLGSSKVLAKKELSYMPIIGWMWYFLEIVFCKRKWEEDRKTVVQKLLNLRDYPEDFWF--LIHCEGTRFTEQKHQISMKVA---EAKGLPKLKYHLLPRTKGFAVTVQCLRNV--VSAVYDSTLNFRNNE--NPTLLGVLNGKKYHADLYIMR--IPLED-VPEDE-QECSIWLHKLYQEKDAFQEEYYRTGTYPAV--------------PTIPPRRPWTLLNWLFWALLLLYPLFQLLINMINSGSSLTLASFAFVII…
	H0ZGD6	Taeniopygia guttata	zebra finch	---MDITGFLKSQFICHLLICYIFIVSGLIINFIQLFTLI-L------WPINKQLFRRINCRL----------AYCISSQMVMLLEWWSGTDCTLYTDPES----FH-KYGKENAIVILNHNFEIDFLCGWNFCERFG-VLGSAKVLAKKELSYVPVIGWMWDFREIVFCKRKWEEDRKTVMQGLFNLRDYPENFWF--LIHCEGTRFTEQKHQISMQVA---EAKGLPKLKYHLLPRTKGFAVTVQCLRNV--VSAVYDSTLNFRNNE--NPTLLGVLSGKKYHADLYVRR--IPLEE-IPEDE-QECSNWLHKLYQEKDAIQEEYYRTGIYPET--------------PIVPPRRPWTLLNWLFWALLLLYPLFKLLINMVSSGSSLTLASFAFVFI…
	A0A1U7RPW2	Alligator sinensis	alligator	---MDITGFLKSQFICHLLICYIFIVSGLIINFIQLFTLL-L------WPINKQLFRRINCRL----------AYCISSQMVMLLEWWSGTDCTLYTDPES----YH-KYGKENAIVILNHNFEIDFLCGWNFCERFG-VLGSAKVLAKKELSYVPVIGWMWYFLEIVFCKRKWEEDRKTVMQGLFNLRDYPENFWF--LIHCEGTRFTEQKHQISMQVA---EAKGLPKLKYHLLPRTKGFAVTVQCLRNV--VSAVYDSTLNFRNNE--NPTLLGVLSGKKYHADLYVRR--IPLEE-IPEDE-QECSNWLHKLYQEKDAIQEEYYRTGVYPET--------------PIVPPRRPWTLLNWLFWALLLLYPLFKLLINMVSSGSSLTLASFAFVFI…
	XP_019405535.1	Crocodylus porosus	crocodile	---MNIAGFLKSQFIFHLLISYIFIASGLIINFIQLFTLI-L------WPFNKQLFRKVNCKL----------AYCLSSQLVMLLEWWSGTTCTLYTDPGH----YH-KYGKENAIVILNHNFEIDFLCGWSFCDRFG-VLGSSKVLAKKELSYMPIIGWMWYFLEMVFCKRKWEEDRKTVMEGLLNLRDYPENFWF--LIHCEGTRFTEQKHEISMQVA---EAKGLP-LKYHLLPRTKGFAVTVQCLRNV--VSAVYDSTLNFRNNE--NPTLLGVLNGKKYHADLYVSYRRIPLG-EVPEDE-QECSNWLHKLYQEKDSFQQEYYKTGVYPGT--------------PIVPSRRPWTLLNWLFWALLLLYPLFKLLINMISSGSSLTLATFVFVFV…
	G1KBG9	Anolis carolinensis	chameleon	---MDIMGFLKSQFICHLILSYVFIMSGLIINLIQLFTLI-L------WPFNKQLFRKINCKL----------SYSLSSQLVVLLEWWSGTTCSIHIDEQS----KH-NIGKENAIVILNHNFEIDFVCGWSCCEKFG-VLGSSKVFAKKELSYMPIIGWMWYFLEMVFCKRKWGEDRKTVMRSLLNLRDYPEYFWF--LIHCEGTRFTEQKHEISMQVA---EAKGLPKLKHHLLPRTKGFALTVQCLRNV--VSAVYDSTLNFRNNE--NPTLLGILHGKKYHADLYVRR--IPLE-EVPEGD-QECSDWLYKLYQEKDIIQEEYYRTGRYPEN--------------STVLPRRPWPLLNWLFWALLLLYPLFKLLINMISSGSYLTLATVASVLI…
	XP_026531027.1	Notechis scutatus	tiger snake	---MDIIGFLKSQFICHLLICYIFIVSGLIINFIQLFTLV-L------WPINKQLFRKVNCRL----------AYCISSQMVMLLEWWSGTDCTLYTDPES----YH-KYGKENAIVILNHNFEIDFLCGWNFCERFG-VLGSSKVLAKKELSYVPIIGWMWYFLEIVFCKRKWEEDRKTVMQSLLNLRDYPENFWF--LIHCEGTRFTEQKHQISMQVA---ETKGLPKLKYHLLPRTKGFAITVQCLRNV--VSAVYDSTLNFRNNE--NPTLLGVLNGKKYHADLYVRR--IPLEE-VPEDE-QECSKWLHRLYQEKDAFQEDYYRTGTYPAT--------------PIVPPRRPWTLLNWLFWALLLLYPLFQLLINMVSSGSSLTLASFAFVII…
	K7FDJ8	Pelodiscus sinensis	softshell turtle	---MDIIGFLKSQFICHLLICYIFIVSGLIINFIQLFTLV-L------WPINKQLFRKINCRL----------AYCISSQMVMLLEWWSGTDCTLYTDPES----YH-KYGKENAIVILNHNYEIDFLCGWNFCERFG-VLGSSKVLAKKELSYVPIIGWMWYFLEIVFCKRKWEEDRKTVMQSLLNLRDYPEKFWF--LIHCEGTRFTEQKHQISMQVA---EAKGLPKLKYHLLPRTKGFAVTVQSLRNV--VSAVYDSTLNFRNNE--NPTLLGVLNGKKYHADLYVRR--IPLEE-VPEDE-QECSKWLHKLYQEKDAFQEEYYRTGTYPAT--------------PIVPPRRPWTLLNWLFWALLLLYPLFQLLINMVSSGSSLTLASFAFVII…
	XP_024050515.1	Terrapene mexicana triunguis	box turtle	---MDIAGFLKSQFLCHLFISYVFIGTGLIVNFIQLCTLI-V------WPFNKQLYRKINCRL----------AYCISSQLVMLLEWWSNTDCTLYTDPEN----YT-KYGKENAIVVLNHNFEIDFLCGWNFCERFG-VLGSSKVLAKKELSYVPVIGWMWYFLEIVFCKRKWEEDRKTVIQGLHNLRDYPEHFWF--LIHCEGTRFTEKKHEISMQVA---EAKGLPKLKHHLLPRTKGFAVTVQSLRNV--VSAVYDSTLNFRNNE--NPTLLGVLNGKKYHADLCVRR--IPLE-EIPEDE-QECASWLHKLYQEKDAFQEEYYKTGAYPGT--------------AVVPPRRPWTLINWIFWASLLSYPLFKVLANMISSGSYFTISVFALLMV…
	Q5M8L4	Xenopus tropicalis	clawed frog	---MNIVGFLKSQFLCHLFISYVFIGTGLIINCIQLLTLL-L------WPFNKQLYRKINCRL----------AYCVSSQLVMLLEWWSGTECTMYTDLEN----YP-KYGKENAIVVLNHNFEIDFLCGWNVCERFG-VLGSSKVLAKKELAYVPVFGWMWYFLEIVFCKRKWEEDRKTVMQALRNLRDYPEHFWF--LIHCEGTRFTEKKHEISMQVA---EAKGLPKLKYHLLPRTKGFAVTVQSLRNV--AAAVYDSTLNFRNNE--NPTLLGILNGTKYHADFYVRR--IPLE-EIPEDE-QECASWLHKLYQEKDAFQEEYYKTGVYPET--------------AIVPARRPWTLVNWLFWASLLSYPLCKVLANMISSGSYLTLAMFALLMV…
	XP_018421716.1	Nanorana parkeri	slow frog	---MNIVGFLKSQFLCHLFISYVFIGTGLIINCIQLLTLL-L------WPFNKQLYRKINCRL----------AYCVSSQLVMLLEWWSGTECTMYTDLEN----YP-KYGKENAIVVLNHNFEIDFLCGWNVCERFG-VLGSSKVLAKKELAYVPVFGWMWYFLEIVFCKRKWEEDRKTVMQALRNLRDYPEHFWF--LIHCEGTRFTEKKHEISMQVA---EAKGLPKLKYHLLPRTKGFAVTVQSLRNV--AAAVYDSTLNFRNNE--NPTLLGILNGTKYHADFYVRR--IPLE-EIPEDE-QECASWLHKLYQEKDAFQEEYYKTGVYPET--------------AIVPARRPWTLVNWLFWASLLSYPLCKVLANMISSGSYLTLAMFALLMV…
	M3XHH5	Latimeria chalumnae	coelacanth	---MDIVGFLKSQFLFHLLICYIFVVTGLTVNFIQLCTLI-L------WPINKQLYRKINCRL----------AYCISSQLVMLLEWWSGTECTLFTNPED----YK-KYGKENAIVILNHNYEIDFLCGWNFCERFG-VLGSSKVLAKKELSYVPLIGWMWYFLEIVFCKRKWEEDRKTVMQSLLNLRDYPENFWF--LIHCEGTRFTEQKHKISMEVA---EAKGLPKLKHHLLPRTKGFAVTVRCLRNV--VSAVYDSTLNFRNNE--NPTLLGVLNGKKYHADLLVRR--IPLE-EIPEGE-NECAAWLHKLYQEKDAYQEEYYKTGVFPGT--------------AIVPPRRPWALLNWLFWATLLLYPLFNFLIDLFWSGSSLTLLSLMIIII…
	XP_015218419.1	Lepisosteus oculatus	spotted gar	---MGVLEFVKSQFLCHLLICYVFLVSGLIINFIQLLTLL-I------WPFNKQFYRRLNCRL----------GYCIASQMVALLEWWSGTECRLYTDLES----YK-LYGKENAIVILNHNFEIDFLCGWTFCERFG-VLGSSKVLAKKELSYVPLIGWMWYFLEIVFCKRKWDEDRTMVAKSLQNLRDYPVNYWF--LLHCEGTRFTEKKHQISMQVA---EAKGLPKLKYHLLPRTKGFCVTVQNLRNS--VAAVYDSTLNFRNNE--NPTLLGLLNGKKYHADLYVRR--IPLE-NIPEDE-VECSNWLHKLYQEKDAFQEEYYKTGRFPGQ--------------AVSPPRRPWALLNFLFWAALLLYPLGHLLVSVISTGSSMTLFSFIALCV…
	F1QX16	Danio rerio	zebrafish	MIRMGLLKVLKTQLLCHLIICYVFLVSGIIINLLQLCTLP-L------WPINKQLARKINCRL----------GYSIASQLVALLEWWSGTECTLYTDPES----FR-LYGKENAIVVLNHNFEIDFMTGWTFCERFG-VLGSSKVLAKKELSFVPVIGWMWYFLEIVFCKRKWEEDRKTVVQSLRNLQDYPEFFWF--LLHCEGTRFTEKKHKISMEVA---EKKGLPKLKYHLLPRTKGFCVTVQNLRGK--VTAVYDSTLNFRNNE--MPTLLGVLNGKKYHADLYVRR--IPLD-SIPEDE-SECAAWLHKLYQEKDEFQEHYRQTGRFPGP--------------ITNPPRRLWALVNWLFWVCVLVYPICVLLLQLLLSGSTFTIVCTFVFCL…
	H2UXZ1	Takifugu rubripes	pufferfish	---MGLWQVLKSQFLCHLIICYVFLVSGLIINVVQICTLP-L------WLLNKQLARRINVRL----------GYCVSSQMVAALEWWSGTECTLYTEPES----YQ-LYGKENAIVVLNHRFELDFLCGWTFCERFG-VLGSSKVLAKKELSYVPIIGWMWYFLEIVFCKRKWEEDRRTVAESLQNLHDYPENFWF--LLFCEGTRFTPKKHQISMQVA---ESKGLPKLKYHLLPRTKGFWVTVQNLRGT--AAAVYDSSLNFRNNQ--TPTLRDILNGKKYHADLYVRR--IPLE-AIPEDE-AECAAWLHKLYQEKDSFQEHYTQTGRFPGP--------------IVTPPRRPWPLINWLFWACLLLYPLGLFLAQLISSGSTLTIVASVVLCS…
	V9KVX2	Callorhinchus milii	ghostshark	---MGIVAFFKSQFICHLIIGYIFVATGLIINLLQVCTLI-L------WPINKQLYRRINCRL----------AYCIASQLVMLLQWWSGTECTLFTDGKN----YS-KYGTESAIVILNHNYEIDFLCGWDFCERFG-VLGSSKVLAKKELSYVPLIGWMWYFLEIVFCKRKWEEDRTNVVRGLLNLRDYPEIFWF--LIHCEGTRFTEKKHQISMQVA---EAKGLPKLKYHLLPRTKGFTVTVQCLRNV--VSAVYDATLNFRNHE--NPTLLGVLNGKKYHADLYVRR--IPLE-DIPEDE-VECAAWLHKLYQEKDALQEQYFRRGTFPGK--------------QIVPPKRLWVLVNWIFWAVLLLFPLFKLVANLVSSGSSLTLISFSLFII…
	XP_011671087.1	Strongylocentrotus purpuratus	sea urchin	---MSN---LREKDPT----------SSL-QKVVSVNRLL-VQ-DPKPFYGTKAFLEKVNESH-SLLWGQSQESYLFFAEVVWLTDYWSGSKVHFYGTKRF----LE-KVKENHSLLVVNHRQGVDWCVIWQMAERFK-MLRGAKCLMKKEIKYVPFFGWSFWLTEQLFVNRDYAKDKNSLMKQLKNITTYDFPTVT--LIFCEGTRFTEEKYEKSQAFA---REKGLPCLKHHLVPRTKGFNLCIEAYKGK--VPFIYDATIAYQYNA--QPSIYDLICGKQFDFHLYVRE--LPLD-EVPTDSEDATAQYCHDMYKQKDEAYDYFLRNDTFEGYDASR---------PGHVPPRTLLPLVVMSSWMVVVGIPLIYYALSILLSGSTLMIIIVCGGSF…
	A0A2G8L368	Stichopus japonicus	sea cucumber	--------------------------------------------------------------------MKSVRRLLSFSELVFLYDTYSGSHIYIHCDDKF----FT-AMNKQHGLLVMNHTFELDWLATWCVADRYG-QLFSAKCFMKNELKYVPLVGWSFYLLEMPFLKRDFVKDREQLVEGVKLLADFPMPAKM--LMFCEGTRFTPEKYEKSKAFA---EKKGLPILKHHLTPRTKGFCMAVEGLKGR--VPVIMDATVACQKND--SATVYDLLLGKRVTYHAFVKI--RSMD-EVPTDSEEETSNYCHQLYQEKDNAMDYFMKNDTFHGYDDTM---------KQHFIPPRIQPTLVAMFWYASLGTLIIYYLLKLLLTGSMLTILIAVLVAF…
	A0A1W4UW11	Drosophila ficusphila	fruit fly	--------MSHLRGLGRLLIAVTFFTCGFFVNIGQFLLILLV------KPFDKKLSRSLMYYL----------NYSFYCILVCVAEWYAGSKLRVYIDPED----EKKFFGKEHGLLLMNHTYEIDWLTAWMITDKLG-ILGGTKAYAKKMLRYVPVMGWVWWMAEFIFLDRNFEKDKVVIKTQLTEVFSYPDPVWL--LLNAEGTRYTAAKHELSVKFA---QERGLPALKHHLIPRTKGFTTSLPTMRGI--CPAIYDINLAFKKNAEPRPTMLSQLNGEPVEPYMYIRR--VALD-KVPDGE-KEAAAWMQDFFAEKDKIIDSFHETGSFFKNSGVKEVP-------EKIYKPRLSTLLNFLGWASVSVLCILNYLVTSLAAGNWIGFITVLSILG…
	XP_021698646.1	Aedes aegypti	mosquito	--MAGFWSTVKQSTLMHLCFAISYFTSGLIINTAQCILYFGL------KPFNKRLYRKIGYYL----------CYSFYSQLVFLADWWSGSTLYIYISDED----LK-HCGKEHVLLLMNHTYEVDWLVGWMFCEKVK-VLGNCKAYAKKVIQYIPTVGWAWKFAEFVFLERSFDKDKEIIGRQIKEIMDYPDPVWL--LLNAEGTRFTEKKHEASIKFA---RDRGMVELKHHLIPRTKGFTASLPELRNK--S-TILDIQLAISKDSPVKPTIFNILNGKPIEAHMHIRR--IPFD-QVPEDE-GQAAEWLQELFRQKDVMQESFHKHGDFFTGSNVTRKV-------PVKLHPRLHTLINMVAWNVLTVVPMIYYLIQLLISGEIMYFSIGASILI…
	A0A154PHH3	Dufourea novaeangliae	bee	-----MLSALKQSTVIHLMFAITFFTSGLIINFFQCLLYLGL------RPFSKYLYRKINYYL----------CYSFYSQLVFLTEWWSGTDVVLYIDKVD----FEKYFGQEHGYVIMNHTYEIDWLIGWNFCERIG-VLGNCKAYAKKSIQYIPTLGWAWKFAESIFLERNWEKDKQIIGTQINELGNYPDCIWL--LLNAEGTRFTAKKLEASQKFA---QEKGLPVLRYHLTPRTKGFTASVPHMRGK--IPAIYDCQVDFKSDDTVKPTITNLLLGKRVVAHLYLQR--ISLD-EVPENE-EAAAKWLYELYQKKDRMAESFTKTGDFFTTSGVPRTD-------CFQLERRVYTLINTIFWAVVVLVPMLYYLVNLFLSGSTTYFSIGVGIIF…
	A0A151I440	Atta colombica	ant	-------------------------------MFVECKQSIIRQSRERKRSIVEFLDERK---R----------NVIEVLELVFMAEWWAGSELILYIDKED----FNKYFGNEHGYLLMNHCYETDWLIGWLLCDRVR-LLGNCKAYAKKSIQYIPTLGWAWKFAESIFLERNWEKDKENVMQSLLNLRDYPENFWF--LIHCEGTRFTEQKHKISMEVA---EAKGLPKLKHHLLPRTKGFTASIPHMRGK--ATAIYDVQIAFKPSDPVKPTMKNLLFGKRLEGYLYAKR--IPIE-EVPEGD-EAAAEWLQTLYQQKDRMAESFYETGDFFATSGVPRIG-------SFRLKRRYYSLVNTICWAIVVLVPMLYYLLRLLLSGSIFGITVAVGVIF…
	V5GN15	Anoplophora glabripennis	long-horned beetle	-MNVSNLQHLKKSRLIHLCLAITFFTSGVIVNLIQCVLYLTL------RPFNKVLYRKINWYL----------CCTIYAQLVFLGDWWSGTRIFMYINKDE----FDKYYGKEHAYCVMNHTYEIDWLIGWMICDRIH-LLGNCKAYAKKVIQYVPVLGWAWKCSEFVFLERSFDKDKEIINKQIIELAEHPDPIWL--LLFPEGTRFTPKKHEASLEFA---RKNNLPELKHHLLPRTRGFIASLPSMKGK--VPAIYDIELAFKENAPSKPTITNMLFGKPLEAHIYMRR--IPME-DLPKTE-VEQETFLRDMFIRKDKLKDSFIKTGDFFETSGLPRVE-------PFELPRRLHSPVHIAFWLSCTLIPISYYLIKLLFSGELLYFSVGASIIG…
	XP_008194730.1	Tribolium castaneum	red flour beetle	----MNILKLKQSRIIHLCFAITFFTSGVIVNLIQCFFYLTL------RPFNRRLYRKLNWYF----------CFTIYSQLVFLGDWWSGSHIKFYIDREE----FDKYYGKEHAYCVMNHTYEIDWLVGWMICDRLH-MLGNCKAYAKKVVQYIPVLGWGWKCSEFVFLERSFDKDKKVIDTQVTELAEHPDPMWL--LLFPEGTRFTPTKHKISLEFA---RQKNLPELKHHLLPRTKGFTASLPSMKGK--VPAVYDIEICFNENDPYKPTIRNMLLGRSVTAHMYMKR--IPLE-NLPQTE-REQEDFLREMFVRKDKLRDSFVKTGDFFATSGIPRVE-------PFEVERRFNSVINIAVWVALICCPMVYYLIKLLFSGELLYFSIGASIIG…
	A0A2S2PS98	Schizaphis graminum	wheat aphid	------MSFIKSSIVTHILIALVFLVSGITVNLLQLLFFIIL------WPLHKELFRKINYYF----------SYIIYSELVFISDWWAGVEYYFYVDKED----YK-YFGKEHAIFIINHKYEIDWLTAWVIHDRIGGILGNCKAFAKNSLKYMPVIGWTWWFGEFLFLQRDLVKDKYTIETKLKTLFEYENPVTM--LLYAEGTRFTKEKQEASIKFA---RTKGLPELKEHLLPRTKGFSIGLPHFRHN--LPAVYNVQIAFRGE--EKPTLRALLNGQRLEAHVYMER--IPIE-KIPEND-KECDKWMYDMYEKKDKMMVSFFNTGDWFKESGVKPVE-------KFVPPYRYYSLLNIVFWSILILTPFFYFTFNVLISGNLLQILLLVVPLG…
	E0W367	Pediculus humanus	body louse	---MDLKDVFHWTKIVYLAFGIVFLTSGILINIVQFFLYVTI------NRFDKRLFRKINYYL----------NYSLFSQIVFLLQYWAGIKVMVHVKKSD----YDKYFGKENVLLIMNHTYEIDWSIGWVLCENCR-MLGNCKTFAKKSIQYIPTLGFAWKVGGSIFLERVWDKDKSVFGSALKELMTYEDVFWL--LLTAEGTRFTKEKHEASKEFA---KKNGLPELRHHLTPRTKGFTMSLPHIRKS--IPAIYNIHIGVKPSD-VEPSLRNLLLRKPLTTGLYAER--IPMS-EVPETE-EEQITWLHNLYKKKDEAFHSYLSTGSWFELSNIEECQ-------GFYLPRRIFPAINFAFWCIAILVPLGYLLIKLLISGSLVYFCTACAILA…
	D3PJA3	Lepeophtheirus salmonis	salmon louse	-------MGWKSWTFFHILFFLTFLISGLAINLLQGLSYL-L------FP--KSLFRRLNYYL----------QWIMYGQFIFFFDWWSSSEVRMYGPSSQIKEMQS-QIGHEHAIILCNHHYETDWLFGWCIAERFR-ILGAAKVFMKAVLKYVPVLGWGWNLSDIIFVKRNWNVDQKLIPAAIQRLNDYPFPFWL--LIYAEGTRFTKEKHLASQDFRLKSMDSNLPDLKHHLIPRTRGFYLTLMNLDFK-AVPAIYDVTLVAQK---ETSSLLRVLNGEPLNVDAFVRR--LPLD-GVEKKE-DSINSFLMKTYKEKDEFIDHFINSGHFGEGTES---I-------HFFPKRRLHSLINAIVLNILVLAPFFYYVIRTFIYGSSFHIGFLIAIYS…
	A0A0N8E7A1	Daphnia magna	planktonic crustacean	-----MLALEKFMFLPVFILFINLFVSGLIINVIQLLLWMCV------RPGSPWLYQKLNYYL----------LYVLWTQIVFIGEWWSSSTCAVLTDDDT----WS-KMGKEHAIVIMNHSFEVDWLMGWMVCEQSR-LLASSKVFIKKSIKWIPIIGWAWQFGEAVFLERNWEKDKVIMGKQVKNLGDYADPVWL--LLFAEGTRFTPAKHAASVEFA---KKSGLQPLQHLLLPRTKGFLLTVEYLRGR--FPAIYCATLAFNCKEGATPTLKNMLLGRRVIGEMLLER--IPLE-DVPENP-QEASKWLYENYHHKDRMLDAYKKEGAFPSADCFGKNHHFQGPIRSHFRPRRLWPVIIMLATSYITLPPVLYALYALFCSGIV-NVLIAVSLVL…
	XP_015789066.1	Tetranychus urticae	spider mite	---MEISKYFELNLVIASLFGVIWIISGLILNIFQFLIYITV------RPISPYVYRKINYYL----------IYSSWSQVVALAEYWAGCTLTVHFADKE----SANCLGTEHSIVLMNHKYEVDWLFSWILSDNFR-ILGSAKGFAKKEIRYLPVIGWGWFFCEMIFVSRQWEKDSQHLGPSVTRLMEYDDVVTL--LIFAEGTRYTKEKYENSVTYC---KDKGLDILEHHLYPRSRGFVYTINKLKDK--LPAIYNIQIAFRKED-PPPTLTSILRRQPLHGYMYIQR--VPMK-NIPKESDEQISNFLLDVYKQKDQLTNYFNEHGKFPGEP-------------PIVLKRRLAPLVQTLFWSFSVIALLIYFIYYLITSKSYILLTVTCLVIS…
	A0A1S3H6K2	Lingula unguis	brachiopod	---MGIFASIKTWFVLHLLMGYIFILSGLIVNCIMFCTLI-I------WPFSKTIYRKVNCYL----------AYWIWSQYTFLGQWWSGSDIVLKTNPED----VK-YYGKEHAIIILNHKYDIDWLLGYFLAERLG-ILGGSKVYGKEMLKFVPIQGWSWYFTESVFLKRNWEQDRKIIIRDIKNLAEFPVNYWVTILMFCEGTRFTEAKHKASMKVA---KEKGLPELKHHLLPRTKGFVLTMQGLKGK--IPAIYDCTVGITKSE-NEPTFMNVVNGKTFKAELKVRR--ITLEEIPTDTD-EECSAWLHKLYQEKDEFYDGFLKKGHFDGA--------------LIEIPKRPWDLLVWLFWAVTLGVPLIYYLIQVLWSGSIYVSGCVVLVIV…
	K1PXY6	Crassostrea gigas	oyster	------MENWKSWPIWFLLFAYVFFVSTLFLNFLQLLSLI-I------WPFDKTLYRKVNYYL----------AYASWCQFTSVGQWWAGCECVLHMDPEE----RR-HLAREHMMVIMNHKYEIDWLMAWILAERIR-MLGTTKIYGKKVLQLIPLIGWAWWFTESLFLKRDWTKDKQIIQEGVRT----------ALLLFPEGTRLTNQKLENSHIVA---KEKGYPIMKHHLLPRPKGFAYSIQELKGK--LNAVYDATVVFDD---GYPSLMDVLHGKKIMSRIRARR--YEVK-DLPDSE-EELSEWLRNLFKEKDDVVEKFYQTKELDRP--------------GFRIPKRYNDLVMHIFWIIVTLVPLLFYLVNVLFYGSLLHKAVIVLVFV…
	A0A210QB20	Mizuhopecten yessoensis	scallop	MASAPLPTKVKKSFLFFLLFMYTFVVSTLIINFLMVLTLL-I------WPFDRKLFRKINYIL----------GYSSWSQFTCIAQWWSGCDIILYIDQKD----RL-FAGKEHILVLMNHTYEIDWLMLWILSERYG-VLGGAKVYGKNMLRYIPLIGWAWYFTECIFLMRNWAKDKKIIADTIKELLDFPDQYWFTLLLFPEGTRFTPEKHEASLKFA---REKGLPEFKHHLLPRTKGFSYTIQALQGKGAVGALYDIAMGFKGNT-VKPTLMNAFRGNAITAHLRMKR--YELE-DLPKEE-EELSQWLRDLFKEKDDLVDEYMKTGKFDLP--------------EYRPPQRLHDLLNWIFWFLVTDIPLFYYLGSVLVAGTITQQLIVLGVVV…
	A0A2B4SZS5	Stylophora pistillata	hood coral	------------------------------------------------------------------------------------------MDIKLYGTKED----FD-KLGKESAICFANHRSDVDWLIGYTLAERVG-VL---------------------------------------------------------AMAIFAEGTRLTEAKVQASVEYA---RANGLPELKHHLLPRSKGFSVTVQYLKDKG-----------------KEPSLISMLTGEAEEVHLWVRR--IPIQDIPCGDI-EETSKWCRKAFQKKDEGMAYFVEHGKFPAE--------------RIDCAKGKRSLVVTILWNILLGVPLLWYILSVLLSGSITSLLIAAIIA…
				. : . ** *: : :. * : **** * * * . :. * ** :** : :. . . * : : . .
	TABLE 2. Sequence alignment of LPAATδ enzymes from different animal species. Multiple sequence alignment was carried out using the web version of the Clustal Omega software (Sievers et al., 2011) at http://www.ebi.ac.uk/Tools/msa/clustalo. Human LPAATδ/AGPAT4 is shown in grey background. Catalytic motifs (Motifs I-IV) are shown with the conserved amino acid residues in blue bold. Lysines approxim…
