# Supplementary material for: The Structure and Function of Acylglycerophosphate Acyltransferase 4/ Lysophosphatidic Acid Acyltransferase Delta (AGPAT4/LPAATδ)
Source: Front Cell Dev Biol. 2019 Aug 2;7:147. doi: 10.3389/fcell.2019.00147 (PMC6688108; doi:10.3389/fcell.2019.00147)
Supplement: Supplementary file 3 [file Table_3.xlsx]

## Sheet: Foglio1
	Accession number	Protein name	Species name	Kingdom name	Motif I NHxxxxD	Residues between motifs I and II (including PxxG pair)			Motif II (F/Y)xxR	Motif III EGTR	Motif IV
	5KYM_A	PlsC	Thermotoga maritima	Bacteria	78 FIVVANHQSLMDIPLILG 95	99 TGAFIAK-EEL--RKIPGVNWYIR119			120YLNGVFLDRKN130	152IVFPEGTRSPDG163	--------183VLPVSIWGTYH193
	A0A0S3QT16	PlsC	Thermosulfidibacter takaii	Bacteria	68 YVIVSNHQSYFDIFVLIV 85	90 IPHFLAK-KEL--FRIPIFGQALR110			111VADVIEIDREN121	142CIYPEGTRSPDG153	--------173FVPVAFHGTRD183
	A0A250LPP1	PlsC	Fusobacterium varium	Bacteria	76 IIFVCNHQSNLDIPAIVT 93	98 DVGFVAK-HEM--KSWPFFGTWMK118			119KSNCVFLNREN129	151VIFPEGERTIDG162	--------182IVPLTLKGTYN192
	Q59188	PlsC	Borrelia burgdorferi	Bacteria	82 VIIMGNHIAAMDPLIFIY 99	104PFVILAK-HSL--LRIPFVNIVLI124			125VMGVIFVNRRS135	157GIFPEGTRNRGG168	--------188ILPVTLYNTNN198
	I0AL93	PlsC	Ignavibacterium album	Bacteria	67 YVFVSNHSSQLDITALQW 84	89 RLAMIFK-KEL--ARIPLFGWQLR109			110LGPYIMIDRKS120	143LVFPEGTRSKTG154	--------174IVPVTINGTEK184
	O25903	PlsC	Helicobacter pylori	Bacteria	68 KLIVLNHQSLLDIIYLEA 85	90 NICWIAK-KEL--GEIPFYGHALT110			111DTGMILIDRED121	143VIFPEGTRGKGG154	--------175IQPMVLINSIK185
	P26647	PlsC	Escherichia coli	Bacteria	67 AIYIANHQNNYDMVTASN 84	89 PTVTVGK-KSL--LWIPFFGQLYW109			110LTGNLLIDRNN120	143WMFPEGTRSRGR154	--------174IIPVCVSTTSN184
	A0A1K3HCG2	PlsC_1	Mycobacterium tuberculosis	Bacteria	67 CVYVGNHQNNYDMITMSN 84	89 RTVTVGK-RSL--IWIPFFGQLYW109			110ISGNILIDRSN120	143WMFPEGTRSRGR154	--------174VVPVCVSTTQG184
	A0A399E7Y0	PlsC	Meiothermus cateniformans	Bacteria	40 VILASNHMSFLDPVVMGV 57	62 VVSYMSR-DDV--FNYPILRWLLP 82			83 RLYVIPVSRGS 93	113GIFPEGRRSRTG124	--------144IVPAAIIGSDK154
	U5QG92	PlsC	Gloeobacter kilaueensis	Bacteria	45 VILASSHASHLDPVILAN 62	67 PVAFMAK-EEL--FTNPVLSRVIR 87			88 LYGAFPVKRGS 98	118GIFLNGTRTPDG129	--------149IVPVAIAGSGL159
	Q49402	PlsC	Mycoplasma genitalium	Bacteria	86 VLVVANHKSNLDPLVLIK103	113PLTFVAK-IEL--KDTV-LFKLMK132			133LIDCVFIDRKN143	165AVFAEGTRILSN176	--------196ILPVSIVGSLG206
	A0A075HSJ9	PlsC	Euryarchaeote KM3_86_F07	Archaea	78 YIYMFNHESMFDHFMIVA 95	100YLTGVAA-EDQ--YSYPVYGAGLR120			121RYKAIPIKREK131	153LIAPEGTRTITG164	--------184IIPVALKDAWR194
	A0A2P6VTP1	AGPAT	Thermoplasmatales archaeon	Archaea	55 GVIASNHASWFDPVFLGS 72	77 PVHWMAK-AGL--FRNPITETFFE 97			98 KAGQIKVDRIS108	129GIFPEGSRTIDG140	--------160VVPVALTS-YS169
	A0A3M0Y4H4	AGPAT	Candidatus Pacearchaeota archaeon	Archaea	61 VVYLSNHLSQLDYFVPKF 78	88 A-RAVAG-DNLRHWVVRNLIYDFE109			110KYGVLWHDRAS120	143LVFPEGGRNREA154	179KSKLARDTKIACLACAYDS197
	A0A2E9U4E8	AGPAT	Candidatus Woesearchaeota archaeon	Archaea	33 FIVACNHASFFDDLAVPS 50	59 KIHFYVH-MRY--FNNYFLRKFLE 79			80 WGGSISVDPTK 90	116GIFPEGTRSING127	--------147VLPMGIIGSHK157
	A0A075H9K7	PlsC	Thaumarchaeote KM3_45_G08	Archaea	1 MVAAKHQSAWETIDLLG 17	22 ACF-VLK-REL--VYIPIFGWYIS 41			42 RNKQIVVNRSA 52	75 VVFPQGTRVEVN 86	--------106IIPVALNSGL115-
	RLI38395.1	AGPAT	Candidatus Bathyarchaeota archaeon	Archaea	86 SVIVCNHLSYLDPLLLIS103	107KQKTIVK-SVF--FKIPVFGWLMK127			128TSGYVPSRAGE138	162FIFPEGTRRRDG173	--------193IKVLFIRNTDI203
	A0A1Q9MU65	AGPAT	Lokiarchaeota archaeon	Archaea	123GIFVGNHVSHLDPFMLSQ140	145RVIWMSK-EEN--FQTPIVRSIFK165			166NFGAFPLKRGT176	196GMFPEGTRSFDG207	--------227IVPVVSAGLEK237
	A0A1Q9NL08	PlsC_2	Candidatus Heimdallarchaeota archaeon	Archaea	94 IILMPNHISHLDGPLAII111	120SIDVIGD-EKL--FKNRFMRKFLS140			141LFNAFPMKKGS151	170LWFPEGQRHKNP181	--------204IIPVFICGAEF214
	XP_019853566.1	AGPAT	Amphimedon queenslandica	Animalia	92 VIYISNHQSTVDWLIPEI109	120RVHYFLK-KAV--LYIPLYGSYLG140			141TRHNIFLKKNQ151	175VIFPEGTRFNLS186	208QVLTPHTTGFELTLETLKE226
	B3RNN2	AGPAT	Trichoplax adhaerens	Animalia	98 YIIVCNHQSSLDLYPLLR115	120KTVAVAK-KEL--LYTPIIGQAAW140			141LTHTVFVDRGD151	174WVFPEGKRNQTG185	--------206IVPVVIRPYEQ216
	T2M661	AGPAT1	Hydra vulgaris	Animalia	92 FVVVSNHQSAIDALIMVK109	114GTAPLAK-EIL--FYVPIFGQVCW134			135LCGTIFINRKQ145	168WIFSEGTRHQRD179	--------199IVPVAISNYRN209
	Q9VYJ4	AGPAT1	Drosophila melanogaster	Animalia	95 CIIVANHQSSLDVLGMFN112	119KCTVVAK-REL--FYAWPFGLAAW139			140LAGLIFIDRVR150	173WVFPEGTRRNTG184	--------204ILPVVFSSYCT214
	Q7KTI0	AGPAT2	Drosophila melanogaster	Animalia	90 AVVIMNHQSAVDLCVLAY107	114RATVVSK-KEV--LYIPFFGIGAW134			135LWGTLYIDRSR145	168LLFPEGTRNSKD179	--------199VQPVVISKYS208-
	A0A2C9KS05	AGPAT	Biomphalaria glabrata	Animalia	99 AVIVVNHQSSLDMIPLFT116	121NCVSLAK-REL--WLTGPFGLGAW141			142LCGTIYINRLD152	175AIFPEGTRNYNG186	--------206IIPVVFSSYDK216
	W4Z4S1	AGPAT	Strongylocentrotus purpuratus	Animalia	93 AIVVANHQSSIDLMSMFS110	117RCVVLGK-KEL--LFFGPFGVSLY137			138LCGTVFVDRLN148	171WIFPEGTRNRET182	--------202VIPIVFSSYSD212
	Q99943	AGPAT1 (LPAATα)	Homo sapiens	Animalia	98 YVVVSNHQSSLDLLGMME115	120RCVPIAK-REL--LWAGSAGLACW140			141LAGVIFIDRKR151	174WVFPEGTRNHNG185	--------205IVPIVMSSYQD215
	O15120	AGPAT2 (LPAATβ)	Homo sapiens	Animalia	92 CVIVSNHQSILDMMGLME109	114RCVQIAK-REL--LFLGPVGLIMY134			135LGGVFFINRQR145	168WIYPEGTRNDNG179	--------199IVPVVYSSFSS209
	Q9NRZ7	AGPAT3 (LPAATγ)	Homo sapiens	Animalia	90 AVIILNHNFEIDFLCGWT107	117SSKVLAK-KEL--LYVPLIGWTWY137			138FLEIVFCKRKW148	172LLYCEGTRFTET183	202YHLLPRTKGFTTAVKCLRG220
	Q9NRZ5	AGPAT4 (LPAATδ)	Homo sapiens	Animalia	90 AIVVLNHKFEIDFLCGWS107	117GSKVLAK-KEL--AYVPIIGWMWY137			138FTEMVFCSRKW148	172LIHCEGTRFTEK183	202HHLLPRTKGFAITVRSLRN220
	Q9NUQ2	AGPAT5 (LPAATε)	Homo sapiens	Animalia	87 IIYLANHQSTVDWIVADI104	114HVRYVLK-EGL--KWLPLYGCYFA134			135QHGGIYVKRSA145	169VIFPEGTRYNPE180	202HVLTPRIKATHVAFDCMKN220
	B7XJ35	AGPAT	Enterocytozoon bieneusi	Fungi	118HIYVSNHTSFLDFIVLSS135	139HHAVISENHGG--IFGLLFKFIIS160			161KNGSICFNRTD171	194IVFPEGVCVNNK205	--------221IVPVALKYKKV231
	A0A0L0HNU1	AGPAT	Spizellomyces punctatus	Fungi	114AVFVCNHQSSLDLLAMGA131	136NVVVMGK-KSI--KYVPLLGWFMA156			157LGNNVFIDRKN167	190WLFPEGTRSHQT201	--------223VIPIVFSTYYP233
	A0A0L0T0Z6	AGPAT	Allomyces macrogynus	Fungi	101AVLVGNHQATLDMITMSA118	123HCTVMAK-KSL--RAVPVLGAFMA143			144ATHAVFVDRGN154	177FVYPEGTRARTR188	--------210IVPVVFSAYDD220
	A0A1R1X9L0	AGPAT	Smittium culicis	Fungi	98 YVFVGNHQSFVDLVWLGV115	120NAVILAK-KVI--KYYPLLGWFMI140			141LADDIFISRGV151	174FFFPEGTRGYHS185	--------208ILPLAISDMHN218
	A0A197K8I3	AGPAT	Mortierella elongata	Fungi	101AIVVCNHQSSMDMMILGR118	123HCVVMAK-KEL--QYFPFLGIFMT143			144LSNAIFIDRKN154	177WIFPEGTRSRLE188	--------210VMPIVAAGYSN220
	A0A367KA60	SLC1_2	Rhizopus azygosporus	Fungi	94 VIFVCNHQSSMDIMLFGA111	116NTSIVAK-KEI--KYYPFLGWYMR136			137LSNAIFLDRKN147	170WVFPEGTRGHES181	--------203IVPVVIANYSH213
	A0A2N1MV30	AGPAT	Rhizophagus irregularis	Fungi	99 AIFICNHQAAVDLLVLGR116	121HCVVVGK-ASL--RFIPLLGMFMS141			142LGHAVFLDRKN152	175FIFPEGTRARLQ186	--------208IVPIVVANYSD218
	A0A2N1JAP2	SLC1_1	Malassezia vespertilionis	Fungi	95 IILVGNHQSVLDIFYLGK112	117RTVIMAK-KEL--RWVPLLGQFMM137			138LGGNIFIDRKS148	171FAFPEGTRSHFA182	--------204IVPVVCENYYR214
	A0A1Y2FM52	AGPAT	Protomyces lactucaedebilis	Fungi	96 AIFISNHQTELDVLMLGR113	118HTSVTSK-KEL--KYMPFLGQFMT138			139LSGTVFIDRAN149	172WIFPEGTRSAFT183	--------205IVPIVVGNYSH215
	P33333	SLC1	Saccharomyces cerevisiae	Fungi	76 YIMIANHQSTLDIFMLGR 93	98 GCTVTAK-KSL--KYVPFLGWFMA118			119LSGTYFLDRSK129	152WVFPEGTRSYTS163	--------185IVPVVVSNTST195
	M2XX36	AGPAT	Galdieria sulphuraria	Plantae	158VMYVANHQSYLDIYVLSA175	179KFKFVSK-IEV--FSYPVIGWAMA199			200LAGYVGLKRGD210	232VMFPEGTRSVHG243	--------263IVPLTILGTRE273
	A8J0J0	AGPAT	Chlamydomonas reinhardtii	Plantae	157VVYVANHQSFLDIYSLFH174	178PFKFISK-TSN--FLIPIIGWSMF198			199LTGHVMINRVD209	231LFFPEGTRSLDC242	--------262VVPITLLGTGS272
	A0A388L0K2	AGPAT	Chara braunii	Plantae	164AVYVANHQSFLDIYTTFQ181	185PFKFISK-STI--FLIPIIGWAMY205			206LTGHVPLKRMD216	238FFFPEGTRSKDG249	--------269VIPITLIGTGE279
	A0A2R6W390	AGPAT	Marchantia polymorpha	Plantae	189AVYVANHQSFLDIYTLFM206	210SFKFISK-TSN--FLIPIIGWSMY230			231LTGHVPLRRMD241	263LFFPEGTRSSDG274	--------294VVPISLIGTGR304
	A0A2K1L2E5	AGPAT	Physcomitrella patens	Plantae	206AVYVANHQSFLDIYTLFQ223	227PFKFISK-TSN--FLIPIIGWSMY247			248MTGHIPLKRMD258	280LFFPEGTRTTDG291	--------311VVPITLIGSGK321
	Q41745	PLS1	Zea mays	Plantae	86 ALIISNHRSDIDWLIGWI103	113STLAVMK-KSS--KFLPVIGWSMW133			134FAEYLFLERSW144	168ALFVEGTRFTPA179	198NVLIPRTKGFVSAVSIMRD216
	Q8GXU8	LPAT1	Arabidopsis thaliana	Plantae	196AVYVSNHQSFLDIYTLLS213	217SFKFISK-TGI--FVIPIIGWAMS237			238MMGVVPLKRMD248	270FFFPEGTRSKDG281	--------301VVPITLMGTGK311
	Q8LG50	LPAT2	Arabidopsis thaliana	Plantae	85 ALVVCNHRSDIDWLVGWI102	112SALAVMK-KSS--KFLPVIGWSMW132			133FSEYLFLERNW143	167ALFVEGTRFTEA178	197NVLIPRTKGFVSAVSNMRS215
	Q9SYC8	LPAT3	Arabidopsis thaliana	Plantae	86 ALVLSNHRSDIDWLIGWV103	113SSLAIMK-KEA--KYLPIIGWSMW133			134FSDYIFLERSW144	168ALFVEGTRFTQE179	198NVLIPRTKGFVSAVSEIRS216
	Q8L4Y2	LPAT4	Arabidopsis thaliana	Plantae	99 VLLIANHRTEVDWMYLWN116	126YIKYVLK-SSL--MKLPIFGWGFH146			147VLEFIPVERKR157	181ALFPEGTDFTEE192	211NVLLPKTRGFGVCLEVLHN229
	Q9LHN4	LPAT5	Arabidopsis thaliana	Plantae	94 VLLIANHRTEVDWMYFWD111	121NIKYVLK-SSL--MKLPLFGWAFH141			142LFEFIPVERRW152	176ALFPEGTDYTEA187	206NVLLPRTKGFVSCLQELSC224
	A0A0H5R611	AGPAT	Spongospora subterranea	Protista	152VVFMYSHASNLDPLAIGA169	174PLRFIGK-KAI--FLIPLFGWLFM194			195LYGHIPIDRHN205	228AISPEGTRSVTG239	--------259IVPVIINDAYD269
	Q8IL28	AGPAT	Plasmodium falciparum	Protista	97 TILFINHLSSVDPWVVNA114	120PIKFVFK-SSL--LKVPIGGQALY140			141FSGSIPLHFTK151	181AIFPEGTRSVQG192	--------212ILPCALHGTNK222
	D8LTF6	AGPAT	Ectocarpus siliculosus	Protista	123VVFVANHGSYLDIPVTNY140	144MCKYLMK-AEL--LWLPIVGWKAV164			165LARDIFVHRGT175	197MTFPEGTRSRDG208	--------228VVPVTITGVTE238
	A0A0S4IXV9	AGPAT	Bodo saltans	Protista	101VIYMYNHTSNLDPVIVMS118	123KFIYK-KEL--MYVPIFGWAML141			142AYKHIAIDRKN152	175AISPEGTRSKTG186	--------206IVPVVITGVFP216
	M7WSS7	AGPAT	Entamoeba histolytica	Protista	92 ALFLCNHTHFYDFLPIVI109	119AMRFFMK-EEI--SKIPLVGFGFY139			140MMDSVYLKRNF150	174TIYPEGTRVKPQ185	204NLLHPRPTGVIVTLQQLRN222
	A0A0L0DDR9	PLS1	Thecamonas trahens	Protista	85 ALLISNHIFLADFWPFFS102	112CIKIFSK-NNV--KYLPGFGWGAW132			133LMGFVFIRRNW143	167LSHPESTRITPR178	198HLLLPRTRGFIATVDALRD216
	A0A0D2WKW1	AGPAT	Capsaspora owczarzaki	Protista	117GVALCNHRSDVDWLFGLV134	144GAKAYMK-GNT--KFLPILGWSWW164			165FLEFVFLSRAW175	199VIFAEGTRYTEE210	229HLLVPRTKGFAYTAMGLRD247
	F2UT01	AGPAT	Salpingoeca rosetta	Protista	110YIFVLNHQSQLDSMVMAT127	132DMVIVAK-RSL--LLMPGIGFILW152			153LTDAILIDRKN163	186AVFPEGTRNRHG197	--------217VVPIVLSEYTD227
					: .* :					:.
TABLE 3. Acyltransferase motifs of LPAAT enzymes from different species belonging to the different biological kingdoms. Multiple sequence alignment was carried out using the web version of the Clustal Omega software (Sievers et al., 2011) at http://www.ebi.ac.uk/Tools/msa/clustalo. Human LPAATδ/AGPAT4 is shown in grey background. Catalytic motifs (Motifs I-IV) are shown with the conserved amino a…
