# Supplementary material for: The Structure and Function of Acylglycerophosphate Acyltransferase 4/ Lysophosphatidic Acid Acyltransferase Delta (AGPAT4/LPAATδ)
Source: Front Cell Dev Biol. 2019 Aug 2;7:147. doi: 10.3389/fcell.2019.00147 (PMC6688108; doi:10.3389/fcell.2019.00147)
Supplement: Supplementary file 4 [file Table_4.xlsx]

## Sheet: Foglio1
	Accession number	Binomial name	Common name	Motif I NHxxxxD	Residues between motifs I and II (including PxxG pair)	Motif II (F/Y)xxR	Motif III EGTR	Motif IV
	Q9NRZ5	Homo sapiens	human	90AIVVLNHKFEIDFLCGWS107	117GSKVLAKKELAYVPIIGWMWY137	138FTEMVFCSRKW148	172LIHCEGTRFTEK183	202HHLLPRTKGFAITVRSLRN220
	G7MR08	Macaca mulatta	macaque	90AIVVLNHKFEIDFLCGWS107	117GSKVLAKKELAYVPIIGWMWY137	138FTEMVFCSRKW148	172LIHCEGTRFTEK183	202HHLLPRTKGFAITVRSLRN220
	U3DG12	Callithrix jacchus	common marmoset	90AIVVLNHKFEIDFLCGWS107	117GSKVLAKKELAYVPIIGWMWY137	138FTEMVFCTRKW148	172LIHCEGTRFTEK183	202HHLLPRTKGFAITVRSLRN220
	XP_008058314.1	Carlito syrichta	tarsier	90AIVVLNHKFEIDFLCGWS107	117GSKVLAKKELAYVPIIGWMWY137	138FTEMVFCTRKW148	172LIHCEGTRFTEK183	202HHLLPRTKGFAITVRSLRN220
	H0WQ63	Otolemur garnettii	galago	90AIVVLNHKFEIDFLCGWS107	117GSKVLAKKELAYVPIIGWMWY137	138FTEMVFCTRKW148	172LIHCEGTRFTEK183	202HHLLPRTKGFVITVRSLRN220
	XP_008572825.1	Galeopterus variegatus	flying lemur	90AIVVLNHKFEIDFLCGWS107	117GSKVLAKKELAYVPIIGWMWY137	138FTEMVFCTRKW148	172LIHCEGTRFTEK183	202HHLLPRTKGFGVTVRSLRN220
	XP_006152312.1	Tupaia chinensis	treeshrew	90AIVVLNHKFEIDFLCGWS107	117GSKVLAKKELAYVPIIGWMWY137	138FTEMVFCTRKW148	172LIHCEGTRFTDK183	202HHLLPRTKGFAVTVRSLRN220
	H0V738	Cavia porcellus	guinea pig	90AIVILNHKFEIDFLCGWS107	117NSKVLAKKELAYVPIIGWMWY137	138FTEMIFCTRKW148	172LIHCEGTRFTEK183	202HHLLPRTKGFAITVKCLRG220
	Q8K4X7	Mus musculus	mouse	90AIVVLNHKFEIDFLCGWS107	117NSKVLAKKELAYVPIIGWMWY137	138FVEMIFCTRKW148	172LIHCEGTRFTEK183	202HHLLPRTKGFAITVKCLRD220
	XP_008261974.1	Oryctolagus cuniculus	rabbit	90AIVVLNHKFEIDFLCGWS107	117NSKVLAKKELAYVPIVGWMWY137	138FTEMIFCSRKW148	172LIHCEGTRFTEK183	202HHLLPRTKGFAVTVRCLRD220
	A0A1S3APM7	Erinaceus europaeus	hedgehog	90AIVVLNHKFEIDFLCGWS107	117ASKVLAKQELAYVPIIGWMWR137	138FTEMVFCARRW148	172LIHCEGTRFTEK183	202HHLLPRTKGFTITVKSLRD220
	L5KEH8	Pteropus alecto	flying fox	90AIVVLNHKFEIDFLCGWS107	117GSKVLAKKELAYVPIIGWMWY137	138FTEMVFCTRKW148	172LIHCEGTRFTEK183	202HHLLPRTKGFAITVRGLRD220
	XP_017525536.1	Manis javanica	pangolin	63AIVVLNHKFEIDFLCGWS80	90 GSKVLAKKELAYVPIIGWMWY110	111FTEMVFCTRKW121	145LIHCEGTRFTEK156	175YHLLPRTKGFTITVRSLRN193
	XP_006932193.1	Felis catus	cat	90AIVVLNHKFEIDFLCGWS107	117GSKVLAKKELAYVPIIGWMWY137	138FTEMVFCTRKW148	172LIHCEGTRFTEK183	202YHLLPRTKGFAVTVRSLRN220
	F6Y4T4	Canis lupus familiaris	dog	90AIVVLNHKFEIDFLCGWS107	117GSKVLAKKELAYVPIIGWMWY137	138FTEMVFCTRKW148	172LIHCEGTRFTEK183	202YHLLPRTKGFAITVRSLRN220
	F6W9J9	Equus caballus	horse	68AIVVLNHKFEIDFLCGWS85	95 GSKVLAKKELAYVPIIGWMWY115	116FTEMVFCTRKW126	150LIHCEGTRFTEK161	180YHLLPRTKGFAITVRSLRN198
	XP_010975047.1	Camelus dromedarius	camel	90AIVVLNHKFEIDFLCGWS107	117GSKVLAKKELAYVPIIGWMWY137	138FTEMVFCTRKW148	172LIHCEGTRFTEK183	202HHLLPRTKGFAVTVRSLRN220
	Q5E9R2	Bos taurus	cattle	90AIVVLNHKFEIDFLCGWS107	117GSKVLAKKELAYVPIIGWMWY137	138FTEMVFCTRKW148	172LIHCEGTRFTEK183	202HHLLPRTKGFAVTVRSLRN220
	A0A2Y9SIF1	Physeter catodon	sperm whale	90AIVVLNHKFEIDFLCGWS107	117GSKVLAKKELAYVPIIGWMWY137	138FTEMVFCTRRW148	172LIHCEGTRFTEK183	202HHLLPRTKGFAITVRSLRN220
	XP_007943472.1	Orycteropus afer afer	aardvark	90AIVVLNHKFEIDFLCGWT107	117ASKVLAKKELAYVPIIGWMWY137	138FLEMVFCKRKW148	172LIHCEGTRFTEK183	202YHLLPRTKGFAVTVRSLRN220
	XP_004702147.1	Echinops telfairi	tenrec	90AIVVLNHKFEIDFLCGWT107	117SSKVLAKKELAYLPIIGWMWY137	138FLEMVFCKRKW148	172LIHCEGTRFTEV183	202HHLLPRTKGFAVTVRSLRN220
	G5E780	Loxodonta africana	elephant	90AIVVLNHKFEIDFLCGWT107	117ASKVLAKKELAYVPIIGWMWY137	138FLEMVFCKRKW148	172LIHCEGTRFTEK183	202YHLLPRTKGFAVTVRSLRN220
	XP_004449866.1	Dasypus novemcinctus	armadillo	90AIVVLNHKFEIDFLCGWS107	117ASKVLAKKELAYVPIIGWMWY137	138FLEMVFCTRKW148	172LIHCEGTRFTEK183	202YHLLPRTKGFAVAVRSLRN220
	F7CDG3	Monodelphis domestica	opossum	90AIVILNHNFEIDFLCGWN107	117SSKVLAKKELSYVPVIGWMWY137	138FLEIVFCSRKW148	172LIHCEGTRFTQQ183	202YHLLPRTKGFAVTVKCLRN220
	XP_020842416.1	Phascolarctos cinereus	koala	90AIVILNHNFEIDFLCGWN107	117SSKVLAKKELSYVPVIGWMWY137	138FLEIVFCSRKW148	172LIHCEGTRFTQQ183	202YHLLPRTKGFAVTVKCLRN220
	XP_023359087.1	Sarcophilus harrisii	Tasmanian devil	90AIVILNHNFEIDFLCGWN107	117SSKVLAKKELSYVPVIGWMWY137	138FLEIVFCSRKW148	172LIHCEGTRFTQQ183	202YHLLPRTKGFAVTVKCLRN220
	XP_009686661.1	Struthio camelus australis	ostrich	90AIVILNHNFEIDFLCGWN107	117SSKVLAKKELSYMPVIGWMWY137	138FLEIVFCKRKW148	172LIHCEGTRFTEQ183	202YHLLPRTKGFAVTVQCLRN220
	E1BY49	Gallus gallus	chicken	90AIVILNHNFEIDFLCGWN107	117SSKVLAKKELSYMPIIGWMWY137	138FLEIVFCKRKW148	172LIHCEGTRFTEQ183	202YHLLPRTKGFAVTVQCLRN220
	A0A1V4JKY2	Patagioenas fasciata monilis	pigeon	90AIVILNHNFEIDFLCGWN107	117SAKVLAKKELSYMPVIGWMWY137	138FLEIVFCKRKW148	172LIHCEGTRFTEQ183	202YHLLPRTKGFAVTVQCLRN220
	H0ZGD6	Taeniopygia guttata	zebra finch	90AIVILNHNFEIDFLCGWN107	117SSKVLAKKELSYMPIIGWMWY137	138FLEIVFCKRKW148	172LIHCEGTRFTEQ183	202YHLLPRTKGFAVTVQCLRN220
	A0A1U7RPW2	Alligator sinensis	alligator	90AIVILNHNFEIDFLCGWN107	117SAKVLAKKELSYVPVIGWMWD137	138FREIVFCKRKW148	172LIHCEGTRFTEQ183	202YHLLPRTKGFAVTVQCLRN220
	XP_019405535.1	Crocodylus porosus	crocodile	90AIVILNHNFEIDFLCGWN107	117SAKVLAKKELSYVPVIGWMWY137	138FLEIVFCKRKW148	172LIHCEGTRFTEQ183	202YHLLPRTKGFAVTVQCLRN220
	G1KBG9	Anolis carolinensis	chameleon	90AIVILNHNFEIDFLCGWS107	117SSKVLAKKELSYMPIIGWMWY137	138FLEMVFCKRKW148	172LIHCEGTRFTEQ183	201YHLLPRTKGFAVTVQCLRN219
	XP_026531027.1	Notechis scutatus	tiger snake	90AIVILNHNFEIDFVCGWS107	117SSKVFAKKELSYMPIIGWMWY137	138FLEMVFCKRKW148	172LIHCEGTRFTEQ183	202HHLLPRTKGFALTVQCLRN220
	K7FDJ8	Pelodiscus sinensis	softshell turtle	90AIVILNHNFEIDFLCGWN107	117SSKVLAKKELSYVPIIGWMWY137	138FLEIVFCKRKW148	172LIHCEGTRFTEQ183	202YHLLPRTKGFAITVQCLRN220
	XP_024050515.1	Terrapene mexicana triunguis	box turtle	90AIVILNHNYEIDFLCGWN107	117SSKVLAKKELSYVPIIGWMWY137	138FLEIVFCKRKW148	172LIHCEGTRFTEQ183	202YHLLPRTKGFAVTVQSLRN220
	Q5M8L4	Xenopus tropicalis	clawed frog	90AIVVLNHNFEIDFLCGWN107	117SSKVLAKKELSYVPVIGWMWY137	138FLEIVFCKRKW148	172LIHCEGTRFTEK183	202HHLLPRTKGFAVTVQSLRN220
	XP_018421716.1	Nanorana parkeri	slow frog	90AIVVLNHNFEIDFLCGWN107	117SSKVLAKKELAYVPVFGWMWY137	138FLEIVFCKRKW148	172LIHCEGTRFTEK183	202YHLLPRTKGFAVTVQSLRN220
	M3XHH5	Latimeria chalumnae	coelacanth	90AIVILNHNYEIDFLCGWN107	117SSKVLAKKELSYVPLIGWMWY137	138FLEIVFCKRKW148	172LIHCEGTRFTEQ183	202HHLLPRTKGFAVTVRCLRN220
	XP_015218419.1	Lepisosteus oculatus	spotted gar	90AIVILNHNFEIDFLCGWT107	117SSKVLAKKELSYVPLIGWMWY137	138FLEIVFCKRKW148	172LLHCEGTRFTEK183	202YHLLPRTKGFCVTVQNLRN220
	F1QX16	Danio rerio	zebrafish	93AIVVLNHNFEIDFMTGWT110	120SSKVLAKKELSFVPVIGWMWY140	141FLEIVFCKRKW151	175LLHCEGTRFTEK186	205YHLLPRTKGFCVTVQNLRG223
	H2UXZ1	Takifugu rubripes	pufferfish	90AIVVLNHRFELDFLCGWT107	117SSKVLAKKELSYVPIIGWMWY137	138FLEIVFCKRKW148	172LLFCEGTRFTPK183	202YHLLPRTKGFWVTVQNLRG220
	V9KVX2	Callorhinchus milii	ghostshark	90AIVILNHNYEIDFLCGWD107	117SSKVLAKKELSYVPLIGWMWY137	138FLEIVFCKRKW148	172LIHCEGTRFTEK183	202YHLLPRTKGFTVTVQCLRN220
	XP_011671087.1	Strongylocentrotus purpuratus	sea urchin	90SLLVVNHRQGVDWCVIWQ107	117GAKCLMKKEIKYVPFFGWSFW137	138LTEQLFVNRDY148	172LIFCEGTRFTEE183	202HHLVPRTKGFNLCIEAYKG220
	A0A2G8L368	Stichopus japonicus	sea cucumber	42GLLVMNHTFELDWLATWC 59	69 SAKCFMKNELKYVPLVGWSFY 89	90 LLEMPFLKRDF100	124LMFCEGTRFTPE135	154HHLTPRTKGFCMAVEGLKG172
	A0A1W4UW11	Drosophila ficusphila	fruit fly	87GLLLMNHTYEIDWLTAWM104	114GTKAYAKKMLRYVPVMGWVWW134	135MAEFIFLDRNF145	169LLNAEGTRYTAA180	199HHLIPRTKGFTTSLPTMRG217
	XP_021698646.1	Aedes aegypti	mosquito	92VLLLMNHTYEVDWLVGWM109	119NCKAYAKKVIQYIPTVGWAWK139	140FAEFVFLERSF150	174LLNAEGTRFTEK185	204HHLIPRTKGFTASLPELRN222
	A0A154PHH3	Dufourea novaeangliae	bee	90GYVIMNHTYEIDWLIGWN107	117NCKAYAKKSIQYIPTLGWAWK137	138FAESIFLERNW148	172LLNAEGTRFTAK183	202YHLTPRTKGFTASVPHMRG220
	A0A151I440	Atta colombica	ant	67GYLLMNHCYETDWLIGWL 84	94 NCKAYAKKSIQYIPTLGWAWK114	115FAESIFLERNW125	149LLYPEGTRFTPK160	179YHLTPRTKGFTASIPHMRG197
	V5GN15	Anoplophora glabripennis	long-horned beetle	94AYCVMNHTYEIDWLIGWM111	121NCKAYAKKVIQYVPVLGWAWK141	142CSEFVFLERSF152	176LLFPEGTRFTPK187	206HHLLPRTRGFIASLPSMKG224
	XP_008194730.1	Tribolium castaneum	red flour beetle	91AYCVMNHTYEIDWLVGWM108	118NCKAYAKKVVQYIPVLGWGWK138	139CSEFVFLERSF149	173LLFPEGTRFTPT184	203HHLLPRTKGFTASLPSMKG221
	A0A2S2PS98	Schizaphis graminum	wheat aphid	88AIFIINHKYEIDWLTAWV105	116NCKAFAKNSLKYMPVIGWTWW136	137FGEFLFLQRDL147	171LLYAEGTRFTKE182	201EHLLPRTKGFSIGLPHFRH219
	E0W367	Pediculus humanus	body louse	92VLLIMNHTYEIDWSIGWV109	119NCKTFAKKSIQYIPTLGFAWK139	140VGGSIFLERVW150	174LLTAEGTRFTKE185	204HHLTPRTKGFTMSLPHIRK222
	D3PJA3	Lepeophtheirus salmonis	salmon louse	88AIILCNHHYETDWLFGWC105	115AAKVFMKAVLKYVPVLGWGWN135	136LSDIIFVKRNW146	170LIYAEGTRFTKE181	203HHLIPRTRGFYLTLMNLDF221
	A0A0N8E7A1	Daphnia magna	planktonic crustacean	89AIVIMNHSFEVDWLMGWM106	116SSKVFIKKSIKWIPIIGWAWQ136	137FGEAVFLERNW147	171LLFAEGTRFTPA182	201HLLLPRTKGFLLTVEYLRG219
	XP_015789066.1	Tetranychus urticae	spider mite	92SIVLMNHKYEVDWLFSWI109	119SAKGFAKKEIRYLPVIGWGWF139	140FCEMIFVSRQW150	174LIFAEGTRYTKE185	204HHLYPRSRGFVYTINKLKD222
	A0A1S3H6K2	Lingula unguis	brachiopod	90AIIILNHKYDIDWLLGYF107	117GSKVYGKEMLKFVPIQGWSWY137	138FTESVFLKRNW148	174LMFCEGTRFTEA185	204HHLLPRTKGFVLTMQGLKG222
	K1PXY6	Crassostrea gigas	oyster	87MMVIMNHKYEIDWLMAWI104	114TTKIYGKKVLQLIPLIGWAWW134	135FTESLFLKRDW145	161LLFPEGTRLTNQ172	191HHLLPRPKGFAYSIQELKG209
	A0A210QB20	Mizuhopecten yessoensis	scallop	93ILVLMNHTYEIDWLMLWI110	120GAKVYGKNMLRYIPLIGWAWY140	141FTECIFLMRNW151	177LLFPEGTRFTPE188	207HHLLPRTKGFSYTIQALQG225
	A0A2B4SZS5	Stylophora pistillata	hood coral	20AICFANHRSDVDWLIGYT 37	-----------------------	------------	48 AIFAEGTRLTEA 59	78 HHLLPRSKGFSVTVQYLKD96
				20AIC. ** *: :			20A : **** *	78 HH* ** :** :
	TABLE 4. Acyltransferase motifs of LPAATδ enzymes from different animal species. Multiple sequence alignment was carried out using the web version of the Clustal Omega software (Sievers et al., 2011) at http://www.ebi.ac.uk/Tools/msa/clustalo. Human LPAATδ/AGPAT4 is shown in grey background. Catalytic motifs (Motifs I-IV) are shown with the conserved amino acid residues in blue bold. Lysines appr…
